# Supplementary material for: Fischer rats exhibit maladaptive structural and molecular right ventricular remodelling in severe pulmonary hypertension: a genetically prone model for right heart failure
Source: PubMed Central journal article supplement — Cardiovasc Res. 2018 Oct 24;115(4):788–99. doi: 10.1093/cvr/cvy258 (PMC6432055; doi:10.1093/cvr/cvy258), 2018-10-24
Supplement: cvy258_supplementary_data.pdf [file cvy258_supplementary_data.pdf]

## **Supplemental Material**

### **Fischer rats exhibit maladaptive structural and molecular right ventricular remodelling in severe pulmonary hypertension: a genetically prone model for right heart failure**

Colin M. Suen, MD, PhD<sup>1,2</sup>; Ketul R. Chaudhary, BPharm, PhD<sup>1,2</sup>; Yupu Deng, MD<sup>1</sup>; Baohua Jiang, MD, PhD<sup>1</sup>; Duncan J. Stewart, MD<sup>1,2</sup>

<sup>1</sup>Sinclair Centre for Regenerative Medicine, Ottawa Hospital Research Institute, Ottawa, Canada

<sup>2</sup>Department of Cellular and Molecular Medicine, Faculty of Medicine, University of Ottawa, Ottawa, Canada

#### **Address for Correspondence:**

Duncan J. Stewart, M.D.

CEO and Scientific Director, Ottawa Hospital Research Institute

501 Smyth road Ottawa, Ontario, K1H 8L6, Canada

Phone: 613-737-8899 x 79017 Fax: 613-739-6294

E-mail: [djstewart@ohri.ca](mailto:djstewart@ohri.ca)

## Results

**Supplemental Table 1: Cardiac structural parameters by echocardiography**

| Parameter/Group     | S-CTL      | F-CTL                   | S-SUHx      | F-SUHx                   |
|---------------------|------------|-------------------------|-------------|--------------------------|
| N- value            | 5          | 5                       | 14          | 13                       |
| Weight (g)          | 330±16     | 224±20 <sup>+</sup>     | 350±58      | 195±14* <sup>#</sup>     |
| RVID-d (µm)         | 2410±628   | 1905±260                | 4110±507*   | 4062±445*                |
| LVID-d (µm)         | 7545±210   | 6050±370 <sup>+</sup>   | 4973±538*   | 3523±401* <sup>#</sup>   |
| RVID-d/BW<br>(µm/g) | 7.26±1.71  | 8.56±1.26               | 11.97±2.12* | 21.05±3.66* <sup>#</sup> |
| LVID-d/BW<br>(µm/g) | 22.86±0.83 | 27.15±1.70 <sup>+</sup> | 14.42±1.93* | 18.14±2.35* <sup>#</sup> |

*ANOVA with Tukey's post-hoc test. \*p<0.05 vs CTL of same strain. <sup>+</sup>p<0.05 vs S-CTL. <sup>#</sup>p<0.05 vs S-SUHx.*

**Supplemental Table 2: Summary of differentially regulated genes in microarray analysis of RV in PH vs control**

| Gene                                             | Gene name                                                 | Fischer Fold change | adj p-value | SD Fold change | adj p-value |
|--------------------------------------------------|-----------------------------------------------------------|---------------------|-------------|----------------|-------------|
| <b>Differentially regulated in either strain</b> |                                                           |                     |             |                |             |
| Nppb                                             | natriuretic peptide B                                     | 12.6193             | 0.0065      | 5.9746         | 0.0833      |
| Nppa                                             | natriuretic peptide A                                     | 47.5618             | 0.0092      | 6.7470         | 0.4638      |
| Hmox1                                            | heme oxygenase 1                                          | 3.5358              | 0.0092      | 1.9637         | 0.2000      |
| Crlf1                                            | cytokine receptor like factor 1                           | 4.4842              | 0.0154      | 2.5757         | 0.0500      |
| Tnk1                                             | TRAF2 and NCK interacting kinase                          | 0.3021              | 0.0154      | 0.5338         | 0.1472      |
| Cyp2e1                                           | cytochrome P450 family 2 subfamily E member 1             | 0.2938              | 0.0154      | 0.3305         | 0.0509      |
| Gabrb2                                           | gamma-aminobutyric acid type A receptor beta2 subunit     | 0.2310              | 0.0169      | 0.1897         | 0.0579      |
| Nadk2                                            | NAD kinase 2, mitochondrial                               | 0.4095              | 0.0169      | 0.5344         | 0.1124      |
| Epha7                                            | EPH receptor A7                                           | 0.3951              | 0.0169      | 0.5941         | 0.3616      |
| Lsmem1                                           | leucine rich single-pass membrane protein 1               | 0.3975              | 0.0169      | 0.5851         | 0.2130      |
| Abhd2                                            | abhydrolase domain containing 2                           | 2.5801              | 0.0169      | 1.8580         | 0.0581      |
| Mir490                                           | microRNA 490                                              | 0.2575              | 0.0169      | 0.3999         | 0.0880      |
| Slc16a10                                         | solute carrier family 16 member 10                        | 0.4209              | 0.0172      | 0.4799         | 0.0541      |
| Vwa8                                             | von Willebrand factor A domain containing 8               | 0.4270              | 0.0172      | 0.5089         | 0.0581      |
| Gpnmb                                            | glycoprotein nmb                                          | 2.5486              | 0.0185      | 2.3586         | 0.0881      |
| Gnao1                                            | G protein subunit alpha o1                                | 3.1942              | 0.0185      | 3.3488         | 0.1210      |
| Syt14                                            | synaptotagmin 14                                          | 0.4589              | 0.0187      | 0.5841         | 0.1266      |
| Cd68                                             | CD68 molecule                                             | 2.0678              | 0.0198      | 1.8196         | 0.1210      |
| Ppm1k                                            | protein phosphatase, Mg2+/Mn2+ dependent 1K               | 0.4623              | 0.0210      | 0.6887         | 0.1593      |
| Nckap5                                           | NCK associated protein 5                                  | 0.3588              | 0.0210      | 0.5747         | 0.0866      |
| Stab1                                            | stabilin 1                                                | 2.1801              | 0.0216      | 1.7006         | 0.1554      |
| Acadsb                                           | acyl-CoA dehydrogenase, short/branched chain              | 0.4789              | 0.0219      | 0.6194         | 0.0994      |
| LOC100359438                                     |                                                           | 0.4617              | 0.0219      | 0.7546         | 0.4779      |
| Cd1d1                                            |                                                           | 0.4610              | 0.0219      | 0.4295         | 0.1039      |
| Isoc1                                            | isochorismatase domain containing 1                       | 0.4949              | 0.0225      | 0.6075         | 0.0637      |
| Rimbp2                                           | RIMS binding protein 2                                    | 0.4639              | 0.0232      | 0.6058         | 0.1310      |
| Gpcpd1                                           | glycerophosphocholine phosphodiesterase 1                 | 0.3461              | 0.0233      | 0.4911         | 0.0541      |
| Klrc3                                            | killer cell lectin like receptor C3                       | 0.4980              | 0.0250      | 0.5679         | 0.6643      |
| Lgals3                                           | galectin 3                                                | 2.2049              | 0.0257      | 1.7769         | 0.1168      |
| Mcam                                             | melanoma cell adhesion molecule                           | 2.3836              | 0.0265      | 1.8103         | 0.0922      |
| Ppp1r3a                                          | protein phosphatase 1 regulatory subunit 3A               | 0.5093              | 0.0265      | 0.6923         | 0.2686      |
| Klrd1                                            | killer cell lectin like receptor D1                       | 0.4406              | 0.0272      | 0.7043         | 0.3498      |
| Gprn3                                            | GPRIN family member 3                                     | 0.4687              | 0.0272      | 0.6638         | 0.1266      |
| F2r                                              | coagulation factor II thrombin receptor                   | 2.1555              | 0.0272      | 1.5522         | 0.0848      |
| Cds1                                             | CDP-diacylglycerol synthase 1                             | 0.3765              | 0.0272      | 0.5248         | 0.2057      |
| Thrb                                             | thyroid hormone receptor beta                             | 0.5263              | 0.0280      | 0.6391         | 0.2081      |
| Tgfb1l1                                          | transforming growth factor beta 1 induced transcript 1    | 2.7864              | 0.0286      | 2.6509         | 0.0564      |
| Decr1                                            | 2,4-dienoyl-CoA reductase 1                               | 0.4151              | 0.0286      | 0.4458         | 0.0553      |
| Mum1l1                                           | MUM1 like 1                                               | 0.5212              | 0.0286      | 0.5951         | 0.1807      |
| P2ry1                                            | purinergic receptor P2Y1                                  | 0.5258              | 0.0286      | 0.6437         | 0.3664      |
| Corin                                            | corin, serine peptidase                                   | 0.5101              | 0.0286      | 0.4859         | 0.1185      |
| Trabd2b                                          | TraB domain containing 2B                                 | 0.5147              | 0.0288      | 0.7094         | 0.1954      |
| Clic1                                            | chloride intracellular channel 1                          | 1.9957              | 0.0288      | 1.6340         | 0.0777      |
| LOC102547230                                     |                                                           | 0.4341              | 0.0291      | 0.6784         | 0.1614      |
| Col6a6                                           | collagen type VI alpha 6 chain                            | 0.3902              | 0.0291      | 0.5727         | 0.1808      |
| ErbB4                                            | erb-b2 receptor tyrosine kinase 4                         | 0.4365              | 0.0291      | 0.6410         | 0.1083      |
| Pfkfb3                                           | phosphofructokinase, platelet                             | 2.5779              | 0.0291      | 2.1292         | 0.0507      |
| Gadd45a                                          | growth arrest and DNA damage inducible alpha              | 2.2398              | 0.0291      | 2.1031         | 0.0529      |
| Grid1                                            | glutamate ionotropic receptor delta type subunit 1        | 0.3503              | 0.0291      | 0.3708         | 0.0610      |
| Tmem196                                          | transmembrane protein 196                                 | 0.5239              | 0.0291      | 0.7424         | 0.2265      |
| Kif20b                                           | kinesin family member 20B                                 | 2.1659              | 0.0291      | 2.0602         | 0.2748      |
| C1qc                                             | complement C1q C chain                                    | 1.9959              | 0.0291      | 1.9067         | 0.1132      |
| LOC498276                                        |                                                           | 1.9087              | 0.0291      | 1.1401         | 0.7588      |
| Ccl2                                             | C-C motif chemokine ligand 2                              | 2.4230              | 0.0291      | 2.6266         | 0.0627      |
| Ednrb                                            | endothelin receptor type B                                | 1.9439              | 0.0292      | 1.7535         | 0.0564      |
| Adamts1                                          | ADAM metalloproteinase with thrombospondin type 1 motif 1 | 2.0433              | 0.0292      | 1.5864         | 0.1343      |
| Tgfb1                                            | transforming growth factor beta 1                         | 1.9433              | 0.0292      | 1.7548         | 0.0564      |
| Anxa2                                            | annexin A2                                                | 2.2868              | 0.0292      | 1.8147         | 0.1086      |
| Ptprd                                            | protein tyrosine phosphatase, receptor type D             | 0.4680              | 0.0292      | 0.5454         | 0.0591      |
| Gcnt1                                            | glucosaminyl (N-acetyl) transferase 1, core 2             | 0.4588              | 0.0292      | 0.5844         | 0.1008      |
| Piwi2                                            | piwi like RNA-mediated gene silencing 2                   | 0.4213              | 0.0292      | 0.4310         | 0.0686      |
| Anxa5                                            | annexin A5                                                | 2.0730              | 0.0292      | 1.7473         | 0.0690      |
| Emc9                                             | ER membrane protein complex subunit 9                     | 0.5078              | 0.0292      | 0.6090         | 0.1168      |
| Eng                                              | endoglin                                                  | 1.8556              | 0.0292      | 1.2453         | 0.4290      |
| Ftl1                                             |                                                           | 1.9465              | 0.0292      | 1.4752         | 0.3036      |

| Gene       | Gene name                                                 | Fischer     |             | SD          |             |
|------------|-----------------------------------------------------------|-------------|-------------|-------------|-------------|
|            |                                                           | Fold change | adj p-value | Fold change | adj p-value |
| Arhgap26   | Rho GTPase activating protein 26                          | 0.4501      | 0.0292      | 0.5790      | 0.1266      |
| Flrt2      | fibronectin leucine rich transmembrane protein 2          | 3.1795      | 0.0292      | 1.9982      | 0.0553      |
| Klhl38     | kelch like family member 38                               | 0.3990      | 0.0292      | 0.5813      | 0.1953      |
| Splc2      | serine palmitoyltransferase long chain base subunit 2     | 2.0422      | 0.0293      | 1.7637      | 0.0534      |
| Osbpl6     | oxysterol binding protein like 6                          | 0.3474      | 0.0293      | 0.4955      | 0.1953      |
| Pank1      | pantothenate kinase 1                                     | 0.5387      | 0.0293      | 0.6471      | 0.2363      |
| Slc16a7    | solute carrier family 16 member 7                         | 0.4054      | 0.0293      | 0.6193      | 0.0880      |
| Sphkap     | SPHK1 interactor, AKAP domain containing                  | 0.5516      | 0.0293      | 1.1640      | 0.8203      |
| Ank2       | ankyrin 2                                                 | 0.5531      | 0.0293      | 0.6038      | 0.0882      |
| Ms4a7      | membrane spanning 4-domains A7                            | 2.1003      | 0.0294      | 1.8086      | 0.2073      |
| Slc22a5    | solute carrier family 22 member 5                         | 0.5633      | 0.0301      | 0.5655      | 0.0509      |
| Cthrc1     | collagen triple helix repeat containing 1                 | 2.4018      | 0.0301      | 2.3199      | 0.0580      |
| Lox1l      | lysyl oxidase like 1                                      | 3.0915      | 0.0301      | 2.7693      | 0.0541      |
| Sqle       | squalene epoxidase                                        | 2.1549      | 0.0301      | 1.5470      | 0.2766      |
| Klrb1c     |                                                           | 0.3473      | 0.0301      | 0.4938      | 0.0813      |
| Fam13a     | family with sequence similarity 13 member A               | 0.5732      | 0.0304      | 0.6874      | 0.2592      |
| Rp1        | RP1, axonemal microtubule associated                      | 0.4705      | 0.0305      | 0.5643      | 0.1986      |
| Amd1       | adenosylmethionine decarboxylase 1                        | 0.5261      | 0.0305      | 0.5684      | 0.0650      |
| Emp1       | epithelial membrane protein 1                             | 2.4771      | 0.0305      | 1.8590      | 0.1283      |
| Myoc       | myocilin                                                  | 0.4173      | 0.0320      | 0.4500      | 0.1593      |
| Rai14      | retinoic acid induced 14                                  | 1.7871      | 0.0322      | 1.3930      | 0.1457      |
| Ppm1l      | protein phosphatase, Mg2+/Mn2+ dependent 1L               | 0.5750      | 0.0322      | 0.5991      | 0.0848      |
| Mpeg1      | macrophage expressed 1                                    | 1.9393      | 0.0322      | 1.9467      | 0.0564      |
| Tgm2       | transglutaminase 2                                        | 2.6232      | 0.0322      | 1.9559      | 0.0564      |
| Hook1      | hook microtubule tethering protein 1                      | 0.4693      | 0.0322      | 0.5573      | 0.0637      |
| Baz1a      | bromodomain adjacent to zinc finger domain 1A             | 1.7083      | 0.0322      | 1.3791      | 0.2085      |
| Ghr        | growth hormone receptor                                   | 0.5459      | 0.0322      | 0.6841      | 0.1492      |
| Hsd12      | hydroxysteroid dehydrogenase like 2                       | 0.5144      | 0.0323      | 0.5890      | 0.1100      |
| Ccr2       | C-C motif chemokine receptor 2                            | 0.2631      | 0.0323      | 0.8702      | 0.7665      |
| LOC367515  |                                                           | 0.4163      | 0.0323      | 0.4570      | 0.2091      |
| Lama5      | laminin subunit alpha 5                                   | 2.0897      | 0.0323      | 1.5082      | 0.1123      |
| Lxn        | latexin                                                   | 2.0314      | 0.0323      | 1.5483      | 0.0922      |
| C5ar1      | complement C5a receptor 1                                 | 1.7979      | 0.0323      | 1.7283      | 0.1853      |
| Tox        | thymocyte selection associated high mobility group box    | 0.4667      | 0.0327      | 0.6375      | 0.1135      |
| Dynap      | dynactin associated protein                               | 0.1679      | 0.0327      | 0.4446      | 0.1644      |
| Map2k6     | mitogen-activated protein kinase kinase 6                 | 0.4174      | 0.0327      | 0.4613      | 0.1277      |
| Il1r1      | interleukin 1 receptor type 1                             | 2.1224      | 0.0327      | 2.0167      | 0.0507      |
| Perp       | PERP, TP53 apoptosis effector                             | 0.3210      | 0.0327      | 0.5573      | 0.0564      |
| LOC681266  |                                                           | 1.8653      | 0.0327      | 1.5956      | 0.1155      |
| Sat1       | spermidine/spermine N1-acetyltransferase 1                | 1.7843      | 0.0327      | 1.2346      | 0.3859      |
| NdrG4      | NDRG family member 4                                      | 1.8221      | 0.0327      | 1.7620      | 0.1100      |
| Cyp4b1     | cytochrome P450 family 4 subfamily B member 1             | 0.4816      | 0.0327      | 0.6240      | 0.1791      |
| Pcnt       | pericentrin                                               | 0.4805      | 0.0329      | 0.5088      | 0.0762      |
| Foxs1      | forkhead box S1                                           | 1.8334      | 0.0330      | 1.0405      | 0.9181      |
| Cd86       | CD86 molecule                                             | 2.1621      | 0.0331      | 2.2042      | 0.0749      |
| Hpgds      | hematopoietic prostaglandin D synthase                    | 2.0509      | 0.0341      | 1.8519      | 0.4206      |
| Fign       | fidgetin, microtubule severing factor                     | 0.4712      | 0.0346      | 0.7347      | 0.3627      |
| Ecm1       | extracellular matrix protein 1                            | 2.2444      | 0.0349      | 1.7361      | 0.2583      |
| Eno2       | enolase 2                                                 | 2.0413      | 0.0349      | 1.1961      | 0.7852      |
| Asb15      | ankyrin repeat and SOCS box containing 15                 | 0.4252      | 0.0351      | 0.5054      | 0.0512      |
| RragB      | Ras related GTP binding B                                 | 0.5592      | 0.0356      | 0.7563      | 0.3097      |
| Acot2      | acyl-CoA thioesterase 2                                   | 0.4934      | 0.0361      | 0.5096      | 0.0994      |
| RGD1561161 |                                                           | 0.5498      | 0.0361      | 0.7491      | 0.2429      |
| Oxr1       | oxidation resistance 1                                    | 0.5818      | 0.0361      | 0.7129      | 0.1464      |
| Cidea      | cell death-inducing DFFA-like effector a                  | 0.5688      | 0.0361      | 0.6675      | 0.1449      |
| Iqub       | IQ motif and ubiquitin domain containing                  | 0.4598      | 0.0361      | 0.5597      | 0.2132      |
| Odc1       | ornithine decarboxylase 1                                 | 1.7727      | 0.0361      | 1.2598      | 0.2845      |
| Prodh      | proline dehydrogenase 1                                   | 0.2257      | 0.0361      | 0.3272      | 0.0570      |
| Ptgis      | prostaglandin I2 synthase                                 | 2.0164      | 0.0362      | 1.6421      | 0.1423      |
| Bche       | butyrylcholinesterase                                     | 0.5872      | 0.0362      | 0.6227      | 0.0690      |
| Ppp1r3d    | protein phosphatase 1 regulatory subunit 3D               | 0.4800      | 0.0362      | 0.5668      | 0.0690      |
| Cdh13      | cadherin 13                                               | 1.9121      | 0.0362      | 1.6179      | 0.1875      |
| Hspb3      | heat shock protein family B (small) member 3              | 2.2230      | 0.0362      | 2.1580      | 0.0564      |
| Fam46c     | family with sequence similarity 46 member C               | 2.5381      | 0.0362      | 1.5855      | 0.1667      |
| Phkg1      | phosphorylase kinase catalytic subunit gamma 1            | 0.4477      | 0.0362      | 0.3786      | 0.1932      |
| Lmcd1      | LIM and cysteine rich domains 1                           | 1.9741      | 0.0362      | 1.5145      | 0.1604      |
| Tmem65     | transmembrane protein 65                                  | 0.5401      | 0.0362      | 0.6660      | 0.1083      |
| Klrl1      | killer cell lectin like receptor K1                       | 0.4881      | 0.0362      | 0.9005      | 0.7189      |
| Ppfibp2    | PPFIA binding protein 2                                   | 0.5066      | 0.0362      | 0.6690      | 0.2821      |
| Islr       | immunoglobulin superfamily containing leucine rich repeat | 3.1070      | 0.0362      | 2.8632      | 0.0849      |

| Gene         | Gene name                                                                  | Fischer<br>Fold<br>change | adj p-<br>value | SD<br>Fold<br>change | adj p-<br>value |
|--------------|----------------------------------------------------------------------------|---------------------------|-----------------|----------------------|-----------------|
| LOC100362543 |                                                                            | 1.8105                    | 0.0362          | 1.0076               | 0.9909          |
| C1qa         | complement C1q A chain                                                     | 1.7697                    | 0.0364          | 1.6708               | 0.2643          |
| Sesn1        | sestrin 1                                                                  | 0.5471                    | 0.0364          | 0.6208               | 0.0762          |
| LOC102552996 |                                                                            | 0.3779                    | 0.0364          | 0.4230               | 0.0677          |
| Unc5b        | unc-5 netrin receptor B                                                    | 2.4247                    | 0.0366          | 1.7126               | 0.2323          |
| Meis1        | Meis homeobox 1                                                            | 0.5786                    | 0.0370          | 0.6180               | 0.0847          |
| Clec7a       | C-type lectin domain family 7 member A                                     | 1.9574                    | 0.0370          | 2.0257               | 0.0709          |
| As3mt        | arsenite methyltransferase                                                 | 0.5786                    | 0.0371          | 0.7430               | 0.2741          |
| Coq10b       | coenzyme Q10B                                                              | 1.6322                    | 0.0371          | 1.6419               | 0.1133          |
| Tbc1d4       | TBC1 domain family member 4                                                | 0.5570                    | 0.0374          | 0.6745               | 0.1114          |
| Junb         | JunB proto-oncogene, AP-1 transcription factor subunit                     | 2.0690                    | 0.0379          | 1.4858               | 0.4009          |
| Avp1l        | arginine vasopressin induced 1                                             | 2.1510                    | 0.0380          | 1.9527               | 0.0963          |
| LOC102547145 |                                                                            | 0.5260                    | 0.0391          | 0.4740               | 0.0690          |
| Srpx2        | sushi repeat containing protein, X-linked 2                                | 1.9295                    | 0.0393          | 2.1069               | 0.0708          |
| Ly86         | lymphocyte antigen 86                                                      | 2.1621                    | 0.0394          | 1.8611               | 0.0564          |
| Itga9        | integrin subunit alpha 9                                                   | 2.1157                    | 0.0400          | 1.9086               | 0.0677          |
| Ccdc28a      | coiled-coil domain containing 28A                                          | 0.5700                    | 0.0400          | 0.6854               | 0.3192          |
| Iqgap2       | IQ motif containing GTPase activating protein 2                            | 0.5428                    | 0.0400          | 0.4149               | 0.0599          |
| Cers4        | ceramide synthase 4                                                        | 0.5569                    | 0.0400          | 0.6403               | 0.1100          |
| Sult1a1      | sulfotransferase family 1A member 1                                        | 0.4401                    | 0.0400          | 0.3987               | 0.0534          |
| Slc27a1      | solute carrier family 27 member 1                                          | 0.5628                    | 0.0400          | 0.6002               | 0.0815          |
| Efcab6       | EF-hand calcium binding domain 6                                           | 2.0039                    | 0.0400          | 2.1749               | 0.1911          |
| Tagln2       | transgelin 2                                                               | 1.8354                    | 0.0400          | 1.3734               | 0.2813          |
| Ldlr         | low density lipoprotein receptor                                           | 1.8171                    | 0.0400          | 1.6550               | 0.2305          |
| B3galt2      | beta-1,3-galactosyltransferase 2                                           | 1.9858                    | 0.0400          | 1.8765               | 0.2581          |
| Sema3d       | semaphorin 3D                                                              | 1.9688                    | 0.0400          | 1.4336               | 0.2150          |
| Usp2         | ubiquitin specific peptidase 2                                             | 0.5857                    | 0.0400          | 0.7713               | 0.2813          |
| Fzd2         | frizzled class receptor 2                                                  | 1.8169                    | 0.0404          | 1.3394               | 0.2313          |
| Plat         | plasminogen activator, tissue type                                         | 2.0445                    | 0.0404          | 1.1778               | 0.6730          |
| Depdc1       | DEP domain containing 1                                                    | 2.2562                    | 0.0408          | 1.4354               | 0.2718          |
| Cd2          | CD2 molecule                                                               | 0.4858                    | 0.0408          | 0.5881               | 0.2021          |
| LOC102555672 |                                                                            | 0.5237                    | 0.0408          | 0.6845               | 0.2256          |
| Vash2        | vasohibin 2                                                                | 2.2300                    | 0.0408          | 1.8462               | 0.0587          |
| LOC691325    |                                                                            | 0.4863                    | 0.0408          | 0.6113               | 0.5106          |
| Gamt         | guanidinoacetate N-methyltransferase                                       | 0.5395                    | 0.0408          | 0.4704               | 0.0507          |
| LOC685505    |                                                                            | 0.5202                    | 0.0409          | 0.8508               | 0.7242          |
| Acs1l        | acyl-CoA synthetase long-chain family member 1                             | 0.5407                    | 0.0409          | 0.5964               | 0.0583          |
| Herc3        | HECT and RLD domain containing E3 ubiquitin protein ligase 3               | 0.5818                    | 0.0409          | 0.6338               | 0.0708          |
| RGD1311756   |                                                                            | 0.5685                    | 0.0411          | 0.6728               | 0.1979          |
| Ftl1l1       |                                                                            | 1.8416                    | 0.0411          | 1.4486               | 0.3458          |
| Mir32        | microRNA 32                                                                | 0.5535                    | 0.0420          | 0.6622               | 0.3126          |
| Tnfaip6      | TNF alpha induced protein 6                                                | 2.0238                    | 0.0426          | 1.1497               | 0.6728          |
| Rhoq         | ras homolog family member Q                                                | 2.2006                    | 0.0426          | 1.9639               | 0.0762          |
| Chi3l1       | chitinase 3 like 1                                                         | 3.6964                    | 0.0427          | 2.5238               | 0.1078          |
| Zfp2         | zinc finger protein, FOG family member 2                                   | 0.6203                    | 0.0430          | 0.7231               | 0.2148          |
| C1qb         | complement C1q B chain                                                     | 1.9006                    | 0.0430          | 2.2538               | 0.1182          |
| Ccnd1        | cyclin D1                                                                  | 2.0780                    | 0.0430          | 1.5976               | 0.1453          |
| Hspa2        | heat shock protein family A (Hsp70) member 2                               | 1.7197                    | 0.0430          | 1.1436               | 0.8045          |
| Cnst         | consortin, connexin sorting protein                                        | 0.5511                    | 0.0430          | 0.6398               | 0.1283          |
| Gcsam        | germinal center associated signaling and motility                          | 0.4676                    | 0.0430          | 0.7320               | 0.2544          |
| Gba3         | glucosylceramidase beta 3 (gene/pseudogene)                                | 3.2596                    | 0.0430          | 2.4416               | 0.0599          |
| Kcnd3        | potassium voltage-gated channel subfamily D member 3                       | 0.6145                    | 0.0430          | 0.8157               | 0.4720          |
| Cd55         | CD55 molecule (Cromer blood group)                                         | 2.1780                    | 0.0430          | 2.2225               | 0.0509          |
| Il1rn        | interleukin 1 receptor antagonist                                          | 1.8775                    | 0.0430          | 1.9872               | 0.0690          |
| Adamts12     | ADAMTS like 2                                                              | 1.9368                    | 0.0430          | 1.7726               | 0.1660          |
| Trpc6        | transient receptor potential cation channel subfamily C member 6           | 2.4916                    | 0.0430          | 2.0454               | 0.0902          |
| Ankrd1       | ankyrin repeat domain 1                                                    | 1.7234                    | 0.0430          | 1.4945               | 0.1008          |
| Alk          | anaplastic lymphoma receptor tyrosine kinase                               | 1.6514                    | 0.0430          | 0.8994               | 0.7564          |
| Dip2c        | disco interacting protein 2 homolog C                                      | 0.5769                    | 0.0430          | 0.5966               | 0.1011          |
| Mical2       | microtubule associated monooxygenase, calponin and LIM domain containing 2 | 1.7775                    | 0.0430          | 1.6038               | 0.0916          |
| Pik3ip1      | phosphoinositide-3-kinase interacting protein 1                            | 0.5748                    | 0.0430          | 0.8054               | 0.5728          |
| Stx11        | syntaxin 11                                                                | 2.5853                    | 0.0430          | 2.5679               | 0.0583          |
| Dcxr         | dicarbonyl and L-xylulose reductase                                        | 0.5728                    | 0.0430          | 0.5156               | 0.1644          |
| Id4          | inhibitor of DNA binding 4, HLH protein                                    | 1.6095                    | 0.0430          | 1.2531               | 0.6149          |
| RGD1563400   |                                                                            | 1.8654                    | 0.0431          | 1.5826               | 0.0849          |
| RGD1566399   |                                                                            | 0.5795                    | 0.0431          | 0.7189               | 0.1729          |
| Ttk          | TTK protein kinase                                                         | 2.0962                    | 0.0431          | 1.7726               | 0.3890          |
| Pde3a        | phosphodiesterase 3A                                                       | 0.5911                    | 0.0431          | 0.6059               | 0.0690          |
| Tax1bp3      | Tax1 binding protein 3                                                     | 1.6857                    | 0.0431          | 1.3386               | 0.3984          |
| Hadhb        | hydroxyacyl-CoA dehydrogenase/3-ketoacyl-CoA thiolase/enoyl-CoA hydratase  | 0.5156                    | 0.0431          | 0.5896               | 0.1100          |

| Gene         | Gene name                                                                    | Fischer<br>Fold<br>change | adj p-<br>value | SD<br>Fold<br>change | adj p-<br>value |
|--------------|------------------------------------------------------------------------------|---------------------------|-----------------|----------------------|-----------------|
|              | (trifunctional protein), beta subunit                                        |                           |                 |                      |                 |
| Ywhag        | tyrosine 3-monooxygenase/tryptophan 5-monooxygenase activation protein gamma | 1.6019                    | 0.0431          | 1.5089               | 0.1372          |
| Pcmt2        | protein-L-isoaspartate (D-aspartate) O-methyltransferase domain containing 2 | 0.6111                    | 0.0431          | 0.6668               | 0.1593          |
| Adam1a       | ADAM metallopeptidase domain 1A (pseudogene)                                 | 0.5637                    | 0.0431          | 0.6560               | 0.1147          |
| Idi1         | isopentenyl-diphosphate delta isomerase 1                                    | 1.8086                    | 0.0432          | 1.5498               | 0.1054          |
| Smim19       | small integral membrane protein 19                                           | 0.6286                    | 0.0432          | 0.7805               | 0.2465          |
| Fhl1         | four and a half LIM domains 1                                                | 1.8109                    | 0.0432          | 1.8584               | 0.0826          |
| Scn3b        | sodium voltage-gated channel beta subunit 3                                  | 4.9263                    | 0.0432          | 4.0952               | 0.0564          |
| Ucp3         | uncoupling protein 3                                                         | 0.5402                    | 0.0432          | 0.4852               | 0.1986          |
| LOC100360507 |                                                                              | 0.3470                    | 0.0432          | 0.4618               | 0.0595          |
| Cecr2        | CECR2, histone acetyl-lysine reader                                          | 0.5280                    | 0.0432          | 0.8546               | 0.4706          |
| Maoa         | monoamine oxidase A                                                          | 2.7086                    | 0.0432          | 2.6604               | 0.1266          |
| Inpp4b       | inositol polyphosphate-4-phosphatase type II B                               | 0.5832                    | 0.0432          | 0.6497               | 0.1283          |
| Slc30a3      | solute carrier family 30 member 3                                            | 1.7877                    | 0.0432          | 1.1824               | 0.5721          |
| Mfap5        | microfibrillar associated protein 5                                          | 2.5310                    | 0.0432          | 1.8905               | 0.1822          |
| Cyb5b        | cytochrome b5 type B                                                         | 0.5977                    | 0.0432          | 0.6025               | 0.0745          |
| Mkx          | mohawk homeobox                                                              | 0.3716                    | 0.0432          | 0.5581               | 0.1724          |
| Hpd          | 4-hydroxyphenylpyruvate dioxygenase                                          | 0.5097                    | 0.0432          | 0.7040               | 0.3932          |
| Inpp5j       | inositol polyphosphate-5-phosphatase J                                       | 1.7940                    | 0.0432          | 1.4286               | 0.2618          |
| Cd151        | CD151 molecule (Raph blood group)                                            | 1.7044                    | 0.0433          | 1.3413               | 0.2778          |
| Tfdp2        | transcription factor Dp-2                                                    | 0.5909                    | 0.0433          | 0.6689               | 0.1135          |
| Ckb          | creatine kinase B                                                            | 2.0692                    | 0.0433          | 1.3041               | 0.4051          |
| Hist2h2bb    | histone cluster 2 H2B family member b (pseudogene)                           | 1.6798                    | 0.0433          | 1.2991               | 0.4878          |
| Zc3h6        | zinc finger CCCH-type containing 6                                           | 0.5810                    | 0.0433          | 0.6929               | 0.2595          |
| Fbp2         | fructose-bisphosphatase 2                                                    | 0.5185                    | 0.0433          | 0.6454               | 0.3914          |
| Car4         | carbonic anhydrase 4                                                         | 0.5373                    | 0.0433          | 0.7146               | 0.2939          |
| Cnn3         | calponin 3                                                                   | 1.6463                    | 0.0433          | 1.4083               | 0.1745          |
| Cep70        | centrosomal protein 70                                                       | 0.5513                    | 0.0433          | 0.7431               | 0.3629          |
| Rps6ka5      | ribosomal protein S6 kinase A5                                               | 0.5553                    | 0.0433          | 0.7109               | 0.3237          |
| Edn1         | endothelin 1                                                                 | 2.2115                    | 0.0433          | 1.3092               | 0.3475          |
| Uck2         | uridine-cytidine kinase 2                                                    | 1.6499                    | 0.0433          | 1.2368               | 0.4720          |
| Foxp2        | forkhead box P2                                                              | 0.5641                    | 0.0433          | 0.6718               | 0.2570          |
| Plk2         | polo like kinase 2                                                           | 2.2053                    | 0.0437          | 1.8946               | 0.0690          |
| Dirc2        | disrupted in renal carcinoma 2                                               | 0.6000                    | 0.0438          | 0.6392               | 0.0787          |
| Thap4        | THAP domain containing 4                                                     | 0.5781                    | 0.0443          | 0.6867               | 0.1701          |
| Tet1         | tet methylcytosine dioxygenase 1                                             | 0.5569                    | 0.0445          | 0.7292               | 0.2845          |
| Gfpt2        | glutamine-fructose-6-phosphate transaminase 2                                | 2.0138                    | 0.0445          | 1.7986               | 0.1100          |
| Tecl1        | trans-2,3-enoyl-CoA reductase-like                                           | 0.5453                    | 0.0446          | 0.6602               | 0.1370          |
| Acot11       | acyl-CoA thioesterase 11                                                     | 0.6083                    | 0.0446          | 0.7376               | 0.1946          |
| Ube2q21      | ubiquitin conjugating enzyme E2 Q2 like                                      | 1.6740                    | 0.0446          | 1.5306               | 0.2268          |
| Pcp4l1       | Purkinje cell protein 4 like 1                                               | 0.6121                    | 0.0446          | 0.7912               | 0.4170          |
| Fgf7         | fibroblast growth factor 7                                                   | 0.4164                    | 0.0446          | 1.1174               | 0.8840          |
| Bcat2        | branched chain amino acid transaminase 2                                     | 0.5283                    | 0.0447          | 0.4722               | 0.0627          |
| Gem          | GTP binding protein overexpressed in skeletal muscle                         | 2.0273                    | 0.0447          | 1.3833               | 0.3096          |
| Epha3        | EPH receptor A3                                                              | 0.4144                    | 0.0447          | 0.6100               | 0.1384          |
| Ctsz         | cathepsin Z                                                                  | 1.7250                    | 0.0449          | 1.4547               | 0.2012          |
| Dnajb5       | DnaJ heat shock protein family (Hsp40) member B5                             | 1.6924                    | 0.0449          | 1.3241               | 0.2623          |
| Mitf         | melanogenesis associated transcription factor                                | 0.6244                    | 0.0449          | 0.7452               | 0.1821          |
| Sh3pxd2b     | SH3 and PX domains 2B                                                        | 2.0287                    | 0.0449          | 1.4692               | 0.1132          |
| Fundc1       | FUN14 domain containing 1                                                    | 0.5994                    | 0.0449          | 0.6424               | 0.1038          |
| Gramd1b      | GRAM domain containing 1B                                                    | 0.6237                    | 0.0449          | 0.8246               | 0.4929          |
| LOC102551257 |                                                                              | 0.5839                    | 0.0453          | 0.9896               | 0.9919          |
| Erc1         | ELKS/RAB6-interacting/CAST family member 1                                   | 0.6294                    | 0.0453          | 0.6861               | 0.1923          |
| Pls3         | plastin 3                                                                    | 1.7026                    | 0.0456          | 1.4876               | 0.1147          |
| Fam81a       | family with sequence similarity 81 member A                                  | 0.5034                    | 0.0456          | 0.5230               | 0.1464          |
| Fibin        | fin bud initiation factor homolog (zebrafish)                                | 4.4079                    | 0.0456          | 2.9882               | 0.0971          |
| Slc25a34     | solute carrier family 25 member 34                                           | 0.5640                    | 0.0456          | 0.6949               | 0.1302          |
| Lamb3        | laminin subunit beta 3                                                       | 2.3516                    | 0.0456          | 1.6636               | 0.1132          |
| Ctsa         | cathepsin A                                                                  | 1.6322                    | 0.0456          | 1.3181               | 0.3022          |
| Lpcat3       | lysophosphatidylcholine acyltransferase 3                                    | 0.5549                    | 0.0456          | 0.5883               | 0.0541          |
| Slamf8       | SLAM family member 8                                                         | 1.7277                    | 0.0456          | 1.4198               | 0.4202          |
| Tpm3         | tropomyosin 3                                                                | 1.5621                    | 0.0456          | 1.3975               | 0.2813          |
| Litaf        | lipopolysaccharide induced TNF factor                                        | 1.7941                    | 0.0458          | 1.4420               | 0.2030          |
| Ccdc28b      | coiled-coil domain containing 28B                                            | 0.6025                    | 0.0458          | 0.6698               | 0.0838          |
| Pnp          | purine nucleoside phosphorylase                                              | 1.8572                    | 0.0458          | 1.5731               | 0.1986          |
| Gstz1        | glutathione S-transferase zeta 1                                             | 0.3416                    | 0.0458          | 0.3193               | 0.0529          |
| Dcaf11       | DDB1 and CUL4 associated factor 11                                           | 0.6299                    | 0.0462          | 0.6825               | 0.1152          |
| Klrb1a       |                                                                              | 0.4479                    | 0.0464          | 0.5254               | 0.1231          |
| Cdkal1       | CDK5 regulatory subunit associated protein 1 like 1                          | 0.5920                    | 0.0464          | 0.8218               | 0.6087          |

| Gene         | Gene name                                                                                                        | Fischer<br>Fold<br>change | adj p-<br>value | SD<br>Fold<br>change | adj p-<br>value |
|--------------|------------------------------------------------------------------------------------------------------------------|---------------------------|-----------------|----------------------|-----------------|
| RGD1305184   |                                                                                                                  | 0.3534                    | 0.0464          | 0.3026               | 0.0813          |
| Ccdc85a      | coiled-coil domain containing 85A                                                                                | 0.5072                    | 0.0464          | 0.5855               | 0.1548          |
| Il7r         | interleukin 7 receptor                                                                                           | 1.8120                    | 0.0464          | 1.7763               | 0.0690          |
| Baalc        | brain and acute leukemia, cytoplasmic                                                                            | 0.4976                    | 0.0464          | 0.7791               | 0.3012          |
| Magix        | MAGI family member, X-linked                                                                                     | 0.5074                    | 0.0464          | 0.5478               | 0.0595          |
| Flnc         | filamin C                                                                                                        | 1.6929                    | 0.0472          | 1.7886               | 0.0553          |
| Sema4d       | semaphorin 4D                                                                                                    | 0.5060                    | 0.0472          | 0.6202               | 0.0833          |
| RGD1562667   |                                                                                                                  | 0.5004                    | 0.0472          | 0.8776               | 0.6924          |
| Csf2rb       | colony stimulating factor 2 receptor beta common subunit                                                         | 1.6623                    | 0.0472          | 1.1842               | 0.6920          |
| RGD1566189   |                                                                                                                  | 1.8958                    | 0.0472          | 1.5528               | 0.2848          |
| Slitrk1      | SLIT and NTRK like family member 1                                                                               | 0.5715                    | 0.0474          | 0.7519               | 0.5645          |
| Ctsc         | cathepsin C                                                                                                      | 0.5919                    | 0.0474          | 0.6528               | 0.1006          |
| Aldh6a1      | aldehyde dehydrogenase 6 family member A1                                                                        | 0.6127                    | 0.0474          | 0.6792               | 0.1155          |
| Med21        | mediator complex subunit 21                                                                                      | 1.5595                    | 0.0475          | 1.6007               | 0.0748          |
| Egln3        | egl-9 family hypoxia inducible factor 3                                                                          | 1.6414                    | 0.0475          | 1.5696               | 0.1372          |
| Disp1        | dispatched RND transporter family member 1                                                                       | 0.6090                    | 0.0477          | 0.8011               | 0.3892          |
| Hmcn2        | hemicentin 2                                                                                                     | 1.9314                    | 0.0477          | 1.6644               | 0.1086          |
| Fads3        | fatty acid desaturase 3                                                                                          | 1.6264                    | 0.0477          | 1.3444               | 0.2649          |
| Hadha        | hydroxyacyl-CoA dehydrogenase/3-ketoacyl-CoA thiolase/enoyl-CoA hydratase (trifunctional protein), alpha subunit | 0.5781                    | 0.0477          | 0.5877               | 0.0570          |
| Fcgr1a       | Fc fragment of IgG receptor Ia                                                                                   | 1.9368                    | 0.0477          | 1.8465               | 0.1369          |
| Iscu         | iron-sulfur cluster assembly enzyme                                                                              | 1.6353                    | 0.0477          | 1.5050               | 0.1622          |
| Lipe         | lipase E, hormone sensitive type                                                                                 | 0.5737                    | 0.0477          | 0.6316               | 0.1302          |
| Adcy6        | adenylate cyclase 6                                                                                              | 0.6064                    | 0.0477          | 0.6092               | 0.0591          |
| Grn          | granulin precursor                                                                                               | 1.6460                    | 0.0477          | 1.4517               | 0.3914          |
| RGD1311251   |                                                                                                                  | 0.5574                    | 0.0477          | 0.9958               | 0.9923          |
| Adcy1        | adenylate cyclase 1                                                                                              | 0.4542                    | 0.0477          | 0.4073               | 0.0690          |
| Pcdh7        | protocadherin 7                                                                                                  | 0.6001                    | 0.0477          | 0.6518               | 0.2091          |
| Vom1r47      |                                                                                                                  | 1.6251                    | 0.0477          | 0.8817               | 0.7573          |
| Gria1        | glutamate ionotropic receptor AMPA type subunit 1                                                                | 0.5874                    | 0.0477          | 0.8105               | 0.6507          |
| LOC102555217 |                                                                                                                  | 0.6386                    | 0.0478          | 1.0296               | 0.9724          |
| Cyp2j4       | cytochrome P450 family 2 subfamily J member 4                                                                    | 0.5471                    | 0.0482          | 0.6544               | 0.1468          |
| Lancl1       | LanC like 1                                                                                                      | 0.6091                    | 0.0483          | 0.7195               | 0.1604          |
| Slamf9       | SLAM family member 9                                                                                             | 2.0779                    | 0.0484          | 1.8273               | 0.2232          |
| Cd69         | CD69 molecule                                                                                                    | 0.4899                    | 0.0484          | 0.6739               | 0.2848          |
| LOC100360205 |                                                                                                                  | 0.5781                    | 0.0484          | 0.9881               | 0.9754          |
| Fxyd6        | FXFD domain containing ion transport regulator 6                                                                 | 2.1596                    | 0.0484          | 1.7110               | 0.0749          |
| Ctsl         | cathepsin L                                                                                                      | 1.5508                    | 0.0486          | 1.4783               | 0.1529          |
| Dlgap1       | DLG associated protein 1                                                                                         | 0.6011                    | 0.0486          | 0.6854               | 0.2683          |
| Htatip2      | HIV-1 Tat interactive protein 2                                                                                  | 1.5989                    | 0.0489          | 1.2813               | 0.3142          |
| Atg10        | autophagy related 10                                                                                             | 0.6463                    | 0.0489          | 0.7319               | 0.1576          |
| Ncapg        | non-SMC condensin I complex subunit G                                                                            | 2.0647                    | 0.0489          | 1.4956               | 0.4178          |
| Ppargc1a     | PPARG coactivator 1 alpha                                                                                        | 0.5387                    | 0.0495          | 0.6473               | 0.0847          |
| Sh3bgrl3     | SH3 domain binding glutamate rich protein like 3                                                                 | 1.6459                    | 0.0496          | 1.2880               | 0.4354          |
| Clnk         | cytokine dependent hematopoietic cell linker                                                                     | 0.5944                    | 0.0496          | 0.7224               | 0.3428          |
| Fcgr1g       | Fc fragment of IgE receptor Ig                                                                                   | 1.6729                    | 0.0498          | 1.9070               | 0.0623          |
| Hfe2         | hemochromatosis type 2 (juvenile)                                                                                | 0.4598                    | 0.0564          | 0.4152               | 0.0214          |
| Lsamp        | limbic system-associated membrane protein                                                                        | 0.2445                    | 0.0569          | 0.2545               | 0.0058          |
| Abca5        | ATP binding cassette subfamily A member 5                                                                        | 3.0678                    | 0.0582          | 2.6446               | 0.0321          |
| Plod2        | procollagen-lysine,2-oxoglutarate 5-dioxygenase 2                                                                | 2.7881                    | 0.0607          | 3.3632               | 0.0236          |
| Rxrg         | retinoid X receptor gamma                                                                                        | 0.4570                    | 0.0610          | 0.4502               | 0.0277          |
| Klrc1        | killer cell lectin like receptor C1                                                                              | 0.5227                    | 0.0616          | 0.4838               | 0.0443          |
| Kcna2        | potassium voltage-gated channel subfamily A member 2                                                             | 0.3121                    | 0.0652          | 0.4640               | 0.0456          |
| Ephx2        | epoxide hydrolase 2                                                                                              | 0.6024                    | 0.0652          | 0.4348               | 0.0443          |
| Crat         | carnitine O-acetyltransferase                                                                                    | 0.5657                    | 0.0652          | 0.5435               | 0.0443          |
| Asb4         | ankyrin repeat and SOCS box containing 4                                                                         | 0.4474                    | 0.0675          | 0.4280               | 0.0371          |
| Aqp7         | aquaporin 7                                                                                                      | 0.2366                    | 0.0696          | 0.1947               | 0.0455          |
| Fitm1        | fat storage inducing transmembrane protein 1                                                                     | 0.5480                    | 0.0696          | 0.4984               | 0.0321          |
| Pi16         | peptidase inhibitor 16                                                                                           | 2.4583                    | 0.0698          | 2.7178               | 0.0472          |
| Fkbp4        | FK506 binding protein 4                                                                                          | 0.4960                    | 0.0702          | 0.4556               | 0.0236          |
| Hadh         | hydroxyacyl-CoA dehydrogenase                                                                                    | 0.4212                    | 0.0750          | 0.4196               | 0.0277          |
| Mybl1        | MYB proto-oncogene like 1                                                                                        | 2.3660                    | 0.0752          | 3.1589               | 0.0419          |
| Tmod4        | tropomodulin 4                                                                                                   | 0.3977                    | 0.0758          | 0.3910               | 0.0236          |
| Dhrs7c       | dehydrogenase/reductase 7C                                                                                       | 0.2363                    | 0.0768          | 0.2433               | 0.0122          |
| Macrodl1     | MACRO domain containing 1                                                                                        | 0.4885                    | 0.0824          | 0.4411               | 0.0277          |
| Uap1         | UDP-N-acetylglucosamine pyrophosphorylase 1                                                                      | 2.2610                    | 0.0824          | 2.0719               | 0.0491          |
| Kcnd2        | potassium voltage-gated channel subfamily D member 2                                                             | 0.3095                    | 0.0845          | 0.3031               | 0.0122          |
| Cln4         | chloride voltage-gated channel 4                                                                                 | 0.5265                    | 0.0845          | 0.4822               | 0.0258          |
| Fap          | fibroblast activation protein alpha                                                                              | 2.3651                    | 0.0877          | 2.8794               | 0.0122          |
| Cxcr4        | C-X-C motif chemokine receptor 4                                                                                 | 2.3851                    | 0.0902          | 2.0009               | 0.0410          |

| Gene         | Gene name                                       | Fischer     | adj p-value | SD          | adj p-value |
|--------------|-------------------------------------------------|-------------|-------------|-------------|-------------|
|              |                                                 | Fold change |             | Fold change |             |
| Clec5a       | C-type lectin domain family 5 member A          | 1.8990      | 0.0939      | 2.8644      | 0.0277      |
| Art1         | ADP-ribosyltransferase 1                        | 0.3555      | 0.1077      | 0.2052      | 0.0132      |
| Fitm2        | fat storage inducing transmembrane protein 2    | 0.5290      | 0.1101      | 0.4200      | 0.0491      |
| Tnfsf18      | tumor necrosis factor superfamily member 18     | 2.1695      | 0.1174      | 2.3636      | 0.0323      |
| Fam111a      | family with sequence similarity 111 member A    | 2.0780      | 0.1226      | 2.6403      | 0.0277      |
| Foxo1        | forkhead box O1                                 | 0.6902      | 0.1385      | 0.5417      | 0.0491      |
| Hhat1        | hedgehog acyltransferase-like                   | 0.5383      | 0.1387      | 0.4082      | 0.0142      |
| Sbsn         | suprabasin                                      | 2.6016      | 0.1445      | 3.0569      | 0.0277      |
| Pfkm         | phosphofructokinase, muscle                     | 0.5536      | 0.1451      | 0.5077      | 0.0410      |
| Depdc7       | DEP domain containing 7                         | 2.0160      | 0.1554      | 2.7717      | 0.0319      |
| Rpl3l        | ribosomal protein L3 like                       | 0.4694      | 0.1722      | 0.5327      | 0.0320      |
| Xpr1         | xenotropic and polytropic retrovirus receptor 1 | 1.9265      | 0.1931      | 1.9420      | 0.0319      |
| Fndc5        | fibronectin type III domain containing 5        | 0.6285      | 0.2257      | 0.4931      | 0.0296      |
| Aoah         | acyloxyacyl hydrolase                           | 1.2598      | 0.4124      | 2.0271      | 0.0410      |
| LOC102554467 |                                                 | 0.7951      | 0.5535      | 0.3352      | 0.0258      |
| Zim1         |                                                 | 0.8618      | 0.7738      | 0.4213      | 0.0277      |
| Fam110c      | family with sequence similarity 110 member C    | 1.0046      | 0.9916      | 2.4596      | 0.0154      |

### Upregulated in both strains

| Gene         | Gene name                                                | Fold change | adj p-value | Fold change | adj p-value |
|--------------|----------------------------------------------------------|-------------|-------------|-------------|-------------|
| Cyp1a1       | cytochrome P450 family 1 subfamily A member 1            | 18.5171     | 0.0007      | 19.9919     | 0.0014      |
| Tceal7       | transcription elongation factor A like 7                 | 11.1439     | 0.0007      | 9.0831      | 0.0115      |
| Rcan1        | regulator of calcineurin 1                               | 3.1554      | 0.0092      | 2.4327      | 0.0258      |
| Tnfrsf12a    | TNF receptor superfamily member 12A                      | 4.0118      | 0.0092      | 3.2911      | 0.0154      |
| Mest         | mesoderm specific transcript                             | 3.0619      | 0.0092      | 2.4075      | 0.0410      |
| Acta1        | actin, alpha 1, skeletal muscle                          | 11.1305     | 0.0097      | 5.5002      | 0.0455      |
| Amica1       | junction adhesion molecule like                          | 3.4190      | 0.0097      | 2.4180      | 0.0258      |
| Akip1        | A-kinase interacting protein 1                           | 6.5008      | 0.0154      | 6.5742      | 0.0036      |
| Ankrd23      | ankyrin repeat domain 23                                 | 7.9228      | 0.0159      | 10.4485     | 0.0122      |
| Bex1         | brain expressed X-linked 1                               | 6.6050      | 0.0172      | 7.3223      | 0.0122      |
| Myot         | myotilin                                                 | 2.5365      | 0.0174      | 2.9235      | 0.0277      |
| Fxyd5        | FXYD domain containing ion transport regulator 5         | 3.0398      | 0.0174      | 2.5173      | 0.0190      |
| Tlr5         | toll like receptor 5                                     | 2.2476      | 0.0187      | 2.3341      | 0.0456      |
| Ncam1        | neural cell adhesion molecule 1                          | 6.9153      | 0.0187      | 7.4160      | 0.0190      |
| Tgfb2        | transforming growth factor beta 2                        | 6.2014      | 0.0209      | 4.7572      | 0.0400      |
| Ccnd2        | cyclin D2                                                | 2.2115      | 0.0219      | 2.2701      | 0.0367      |
| Cyp1b1       | cytochrome P450 family 1 subfamily B member 1            | 5.8359      | 0.0219      | 4.2054      | 0.0256      |
| Tsc22d1      | TSC22 domain family member 1                             | 2.7726      | 0.0225      | 2.5858      | 0.0132      |
| Osmr         | oncostatin M receptor                                    | 2.2309      | 0.0232      | 2.1514      | 0.0296      |
| Thbs1        | thrombospondin 1                                         | 5.0405      | 0.0232      | 3.1856      | 0.0442      |
| Ahr1         | aryl-hydrocarbon receptor repressor                      | 2.7523      | 0.0272      | 2.3674      | 0.0410      |
| Fgf23        | fibroblast growth factor 23                              | 9.1111      | 0.0272      | 4.5384      | 0.0277      |
| Ifitm1       | interferon induced transmembrane protein 1               | 2.6934      | 0.0272      | 2.0651      | 0.0320      |
| Rnd1         | Rho family GTPase 1                                      | 4.9707      | 0.0272      | 4.2722      | 0.0230      |
| RGD1559864   |                                                          | 2.7574      | 0.0274      | 2.1238      | 0.0410      |
| Gclc         | glutamate-cysteine ligase catalytic subunit              | 2.0524      | 0.0291      | 2.0330      | 0.0491      |
| Postn        | periostin                                                | 8.8373      | 0.0291      | 7.0604      | 0.0491      |
| Enah         | enabled homolog (Drosophila)                             | 2.7077      | 0.0291      | 2.4483      | 0.0277      |
| LOC100910669 |                                                          | 2.1784      | 0.0292      | 2.5888      | 0.0443      |
| Ctgf         | connective tissue growth factor                          | 4.8038      | 0.0292      | 3.5118      | 0.0367      |
| Tmem100      | transmembrane protein 100                                | 3.3493      | 0.0312      | 3.6365      | 0.0236      |
| Col8a1       | collagen type VIII alpha 1 chain                         | 6.1455      | 0.0318      | 6.4619      | 0.0251      |
| C3           | complement C3                                            | 2.1784      | 0.0322      | 1.9973      | 0.0410      |
| Timp1        | TIMP metalloproteinase inhibitor 1                       | 3.1414      | 0.0327      | 3.2529      | 0.0122      |
| Olr1         | oxidized low density lipoprotein receptor 1              | 5.4220      | 0.0338      | 8.2207      | 0.0122      |
| Wbp5         | transcription elongation factor A like 9                 | 1.9770      | 0.0361      | 1.9143      | 0.0320      |
| RGD1311744   |                                                          | 4.5079      | 0.0361      | 3.5994      | 0.0277      |
| Thbs4        | thrombospondin 4                                         | 16.5124     | 0.0362      | 10.1139     | 0.0125      |
| Prss23       | protease, serine 23                                      | 2.3515      | 0.0420      | 2.5018      | 0.0431      |
| Cx3cr1       | C-X3-C motif chemokine receptor 1                        | 2.3420      | 0.0430      | 2.4459      | 0.0376      |
| Xirp2        | xin actin binding repeat containing 2                    | 2.6386      | 0.0431      | 3.0736      | 0.0151      |
| Cilp         | cartilage intermediate layer protein                     | 6.6490      | 0.0444      | 6.7025      | 0.0132      |
| Ltbp2        | latent transforming growth factor beta binding protein 2 | 7.4955      | 0.0446      | 6.1763      | 0.0368      |
| Loxl2        | lysyl oxidase like 2                                     | 2.5768      | 0.0449      | 2.3845      | 0.0304      |
| MGC105649    |                                                          | 2.5626      | 0.0456      | 2.6759      | 0.0258      |
| Cxcl16       | C-X-C motif chemokine ligand 16                          | 2.2244      | 0.0456      | 2.5248      | 0.0154      |
| Sorbs2       | sorbin and SH3 domain containing 2                       | 1.7747      | 0.0472      | 1.9178      | 0.0367      |
| Serpine2     | serpin family E member 2                                 | 3.7100      | 0.0477      | 3.4697      | 0.0236      |
| Nupr1        | nuclear protein 1, transcriptional regulator             | 3.6261      | 0.0484      | 2.6827      | 0.0277      |



| Gene                                 | Gene name                                                                              | Fischer<br>Fold<br>change | adj p-<br>value | SD<br>Fold<br>change | adj p-<br>value |
|--------------------------------------|----------------------------------------------------------------------------------------|---------------------------|-----------------|----------------------|-----------------|
| <b>Downregulated in both strains</b> |                                                                                        |                           |                 |                      |                 |
| Gene                                 | Gene name                                                                              | Fold                      | adj p-          | Fold                 | adj p-          |
| Cacng6                               | calcium voltage-gated channel auxiliary subunit gamma 6                                | 0.2624                    | 0.0092          | 0.3896               | 0.0258          |
| Kir3dl1                              | killer cell immunoglobulin like receptor, three Ig domains and long cytoplasmic tail 1 | 0.2832                    | 0.0092          | 0.4109               | 0.0258          |
| Ddit4l                               | DNA damage inducible transcript 4 like                                                 | 0.2523                    | 0.0154          | 0.1839               | 0.0036          |
| Klhl33                               | kelch like family member 33                                                            | 0.3387                    | 0.0169          | 0.2926               | 0.0122          |
| Gpam                                 | glycerol-3-phosphate acyltransferase, mitochondrial                                    | 0.3731                    | 0.0169          | 0.4247               | 0.0435          |
| Angpt1                               | angiopoietin 1                                                                         | 0.1475                    | 0.0169          | 0.2580               | 0.0266          |
| Ros1                                 | ROS proto-oncogene 1, receptor tyrosine kinase                                         | 0.3535                    | 0.0288          | 0.4413               | 0.0407          |
| Kcnk2                                | potassium two pore domain channel subfamily K member 2                                 | 0.2946                    | 0.0288          | 0.2547               | 0.0189          |
| Scn4b                                | sodium voltage-gated channel beta subunit 4                                            | 0.2675                    | 0.0291          | 0.2761               | 0.0218          |
| Deptor                               | DEP domain containing MTOR interacting protein                                         | 0.5285                    | 0.0291          | 0.5071               | 0.0312          |
| Atp6ap1l                             | ATPase H <sup>+</sup> transporting accessory protein 1 like                            | 0.1626                    | 0.0292          | 0.2850               | 0.0236          |
| Stc2                                 | stanniocalcin 2                                                                        | 0.4889                    | 0.0292          | 0.4642               | 0.0277          |
| Pcdh11x                              | protocadherin 11 X-linked                                                              | 0.3645                    | 0.0292          | 0.4130               | 0.0154          |
| Nudt4                                | nudix hydrolase 4                                                                      | 0.4203                    | 0.0293          | 0.3905               | 0.0277          |
| Slc25a42                             | solute carrier family 25 member 42                                                     | 0.5063                    | 0.0322          | 0.4913               | 0.0320          |
| Cxadr                                | coxsackie virus and adenovirus receptor                                                | 0.4989                    | 0.0323          | 0.4568               | 0.0277          |
| Acacb                                | acetyl-CoA carboxylase beta                                                            | 0.4314                    | 0.0327          | 0.5231               | 0.0367          |
| Tmem116                              | transmembrane protein 116                                                              | 0.5546                    | 0.0356          | 0.5792               | 0.0491          |
| Atp1a2                               | ATPase Na <sup>+</sup> /K <sup>+</sup> transporting subunit alpha 2                    | 0.3742                    | 0.0362          | 0.3195               | 0.0320          |
| Myo16                                | myosin XVI                                                                             | 0.2895                    | 0.0362          | 0.5090               | 0.0407          |
| Eci1                                 | enoyl-CoA delta isomerase 1                                                            | 0.4324                    | 0.0362          | 0.4091               | 0.0420          |
| Myo10                                | myosin X                                                                               | 0.5215                    | 0.0362          | 0.5310               | 0.0320          |
| Acsf2                                | acyl-CoA synthetase family member 2                                                    | 0.4230                    | 0.0387          | 0.5071               | 0.0456          |
| Mlycd                                | malonyl-CoA decarboxylase                                                              | 0.5195                    | 0.0430          | 0.5251               | 0.0457          |
| Ech1                                 | enoyl-CoA hydratase 1                                                                  | 0.3300                    | 0.0431          | 0.3291               | 0.0400          |
| Ano5                                 | anoctamin 5                                                                            | 0.4978                    | 0.0433          | 0.1547               | 0.0058          |
| Il2rb                                | interleukin 2 receptor subunit beta                                                    | 0.4767                    | 0.0437          | 0.3749               | 0.0132          |
| Selenbp1                             | selenium binding protein 1                                                             | 0.4853                    | 0.0443          | 0.4630               | 0.0420          |
| Adra1b                               | adrenoceptor alpha 1B                                                                  | 0.4688                    | 0.0456          | 0.5236               | 0.0320          |
| Rbfox1                               | RNA binding protein, fox-1 homolog 1                                                   | 0.3527                    | 0.0458          | 0.4154               | 0.0265          |
| Lpin1                                | lipin 1                                                                                | 0.5031                    | 0.0469          | 0.4324               | 0.0320          |
| Cdnf                                 | cerebral dopamine neurotrophic factor                                                  | 0.4915                    | 0.0472          | 0.4990               | 0.0457          |

### Supplemental Table 3. GO Term enrichment analysis for SD subset

| GO term       | Count | P-Value     | Genes              |
|---------------|-------|-------------|--------------------|
| Embryogenesis | 3     | 0.032027262 | XPR1, FOXO1, HHATL |

### Supplemental Table 4. GO Term enrichment analysis for both strains subset

| GO term                                            | Count | P-Value     | Genes                                                                                              |
|----------------------------------------------------|-------|-------------|----------------------------------------------------------------------------------------------------|
| Fatty acid metabolism                              | 5     | 0.00725223  | ECH1, CYP1B1, CYP1A1, ACACB, ACSF2                                                                 |
| Cell communication                                 | 10    | 0.03060527  | NCAM1, AHRR, LTBP2, CTGF, PCDH11X, FGF23, ANGPT1, COL8A1, AMICA1, KIR3DL1                          |
| Lipid, fatty acid and steroid metabolism           | 8     | 0.031723598 | ECH1, CYP1B1, NUDT4, CYP1A1, ACACB, GPAM, LPIN1, ACSF2                                             |
| Immunity and defense                               | 11    | 0.04201403  | IL2RB, AHRR, IFITM1, C3, CXCL16, CX3CR1, SELENBP1, THBS1, CXADR, KIR3DL1, THBS4                    |
| Receptor protein tyrosine kinase signaling pathway | 4     | 0.047277736 | CTGF, FGF23, ANGPT1, ROS1                                                                          |
| Developmental processes                            | 14    | 0.058482062 | LTBP2, PCDH11X, RCAN1, POSTN, TLR5, LPIN1, TGFB2, TIMP1, NCAM1, ADRA1B, ANGPT1, THBS1, ROS1, THBS4 |
| Cytokine and chemokine mediated signaling pathway  | 4     | 0.061125532 | IL2RB, OSMR, CX3CR1, TLR5                                                                          |
| Other developmental process                        | 3     | 0.062572317 | THBS1, TIMP1, THBS4                                                                                |

**Supplemental Table 5. Baseline angiogenic gene expression in RV of Fischer vs SD rats.**

| <b>Genes</b>              | <b>Gene name</b>                                                                                               | <b>Fold Change</b> | <b>p-value</b> |
|---------------------------|----------------------------------------------------------------------------------------------------------------|--------------------|----------------|
| <b>Up-regulated genes</b> |                                                                                                                |                    |                |
| Cxcl9                     | Chemokine (C-X-C motif) ligand 9                                                                               | 2.7403             | 0.0007         |
| Tymp                      | Thymidine phosphorylase                                                                                        | 1.5117             | 0.0108         |
| Ccl2                      | Chemokine (C-C motif) ligand 2                                                                                 | 2.1864             | 0.0235         |
| Angpt1                    | Angiopoietin 1                                                                                                 | 1.9241             | 0.0274         |
| Timp2                     | metallopeptidase inhibitor 2                                                                                   | 1.2288             | 0.0279         |
| Fgf2                      | Fibroblast growth factor 2                                                                                     | 1.6755             | 0.0308         |
| Egf                       | Epidermal growth factor                                                                                        | 1.9414             | 0.0351         |
| Id1                       | Inhibitor of DNA binding 1                                                                                     | 1.3386             | 0.0398         |
| Vegfc                     | Vascular endothelial growth factor C                                                                           | 1.3973             | 0.0407         |
| Fn1                       | Fibronectin 1                                                                                                  | 1.3312             | 0.0435         |
| Tnf                       | Tumor necrosis factor (TNF superfamily, member 2)                                                              | 2.3042             | 0.0457         |
| Serp1n1                   | Serpin peptidase inhibitor, clade E (nexin, plasminogen activator inhibitor type 1), member 1                  | 1.6995             | 0.0552         |
| Itgav                     | Integrin, alpha V                                                                                              | 1.2264             | 0.0702         |
| Pecam1                    | Platelet/endothelial cell adhesion molecule 1                                                                  | 1.2259             | 0.1365         |
| F3                        | Coagulation factor III (thromboplastin, tissue factor)                                                         | 1.3163             | 0.1598         |
| Plau                      | Plasminogen activator, urokinase                                                                               | 1.5155             | 0.1610         |
| Itga1                     | Integrin, alpha 5 (fibronectin receptor, alpha polypeptide)                                                    | 1.2771             | 0.1981         |
| Pdgfb                     | Platelet-derived growth factor beta polypeptide (simian sarcoma viral (v-sis) oncogene homolog)                | 1.1683             | 0.2119         |
| Mapk14                    | Mitogen activated protein kinase 14                                                                            | 1.2602             | 0.2158         |
| Pdgfa                     | Platelet-derived growth factor alpha polypeptide                                                               | 1.1631             | 0.2281         |
| Vegfa                     | Vascular endothelial growth factor A                                                                           | 1.2601             | 0.2295         |
| Hif1a                     | Hypoxia-inducible factor 1, alpha subunit (basic helix-loop-helix transcription factor)                        | 1.3209             | 0.2305         |
| Epas1                     | Endothelial PAS domain protein 1                                                                               | 1.1778             | 0.2465         |
| Pgf                       | Placental growth factor                                                                                        | 1.2320             | 0.2751         |
| Efna1                     | Ephrin A1                                                                                                      | 1.2069             | 0.2819         |
| Vegfb                     | Vascular endothelial growth factor B                                                                           | 1.2003             | 0.3225         |
| ErbB2                     | V-erb-b2 erythroblastic leukemia viral oncogene homolog 2, neuro/glioblastoma derived oncogene homolog (avian) | 1.2253             | 0.3232         |
| Il1b                      | Interleukin 1 beta                                                                                             | 1.5163             | 0.3928         |
| Eng                       | Endoglin                                                                                                       | 1.1375             | 0.4442         |
| Mdk                       | Midkine                                                                                                        | 1.1446             | 0.4494         |
| Flt1                      | Fms-related tyrosine kinase 1                                                                                  | 1.1094             | 0.4499         |
| Timp1                     | metallopeptidase inhibitor 1                                                                                   | 1.1329             | 0.4741         |

|       |                                             |        |        |
|-------|---------------------------------------------|--------|--------|
| Tgfb1 | Transforming growth factor, beta receptor 1 | 1.1096 | 0.4790 |
| Thbs1 | Thrombospondin 1                            | 1.1433 | 0.5190 |
| Fgf1  | Fibroblast growth factor 1                  | 1.1487 | 0.5246 |
| Jag1  | Jagged 1                                    | 1.0542 | 0.6990 |
| Hgf   | Hepatocyte growth factor                    | 1.0584 | 0.7390 |
| Sphk1 | Sphingosine kinase 1                        | 1.1245 | 0.8130 |
| Nrp1  | Neuropilin 1                                | 1.0383 | 0.8598 |
| Plg   | Plasminogen                                 | 1.0185 | 0.9625 |
| Mmp2  | Matrix metalloproteinase 2                  | 1.0087 | 0.9782 |

### Down-regulated genes

|          |                                                                                                        |        |        |
|----------|--------------------------------------------------------------------------------------------------------|--------|--------|
| Edn1     | Endothelin 1                                                                                           | 0.5029 | 0.0120 |
| Tgfb3    | Transforming growth factor, beta receptor 3                                                            | 0.7895 | 0.0135 |
| Cdh5     | Cadherin 5                                                                                             | 0.7139 | 0.0198 |
| Timp3    | metalloproteinase inhibitor 3                                                                          | 0.8594 | 0.0265 |
| Figf     | C-fos induced growth factor                                                                            | 0.5192 | 0.0429 |
| Ptgs1    | Prostaglandin-endoperoxide synthase 1                                                                  | 0.6824 | 0.1048 |
| Igf1     | Insulin-like growth factor 1                                                                           | 0.7624 | 0.1057 |
| Nrp2     | Neuropilin 2                                                                                           | 0.8206 | 0.1836 |
| Anpep    | Alanyl (membrane) aminopeptidase                                                                       | 0.8957 | 0.2219 |
| Serpinf1 | Serpin peptidase inhibitor, clade F (alpha-2 antiplasmin, pigment epithelium derived factor), member 1 | 0.8987 | 0.2346 |
| Akt1     | V-akt murine thymoma viral oncogene homolog 1                                                          | 0.8554 | 0.3300 |
| Nos3     | Nitric oxide synthase 3, endothelial cell                                                              | 0.8973 | 0.3898 |
| Ang1     | Angiogenin, ribonuclease, RNase A family, 5                                                            | 0.8150 | 0.4004 |
| Tie1     | Tyrosine kinase with immunoglobulin-like and EGF-like domains 1                                        | 0.8983 | 0.4228 |
| Mmp14    | Matrix metalloproteinase 14 (membrane-inserted)                                                        | 0.9256 | 0.4289 |
| Col4a3   | Collagen, type IV, alpha 3                                                                             | 0.9116 | 0.4470 |
| Tgfb2    | Transforming growth factor, beta receptor 2                                                            | 0.9213 | 0.5209 |
| Ctgf     | Connective tissue growth factor                                                                        | 0.9400 | 0.6147 |
| Mmp19    | Matrix metalloproteinase 19                                                                            | 0.9536 | 0.6477 |
| Fgfr3    | Fibroblast growth factor receptor 3                                                                    | 0.9511 | 0.6717 |
| Kdr      | Kinase insert domain receptor                                                                          | 0.9581 | 0.7085 |
| Itgb3    | Integrin, beta 3                                                                                       | 0.9644 | 0.7314 |
| S1pr1    | Sphingosine-1-phosphate receptor 1                                                                     | 0.9683 | 0.7653 |
| Col18a1  | Collagen, type XVIII, alpha 1                                                                          | 0.9663 | 0.7660 |
| Ptk2     | protein tyrosine kinase 2                                                                              | 0.9980 | 0.9235 |
| Tek      | tyrosine kinase, endothelial                                                                           | 0.9955 | 0.9367 |
| Angpt2   | Angiopoietin 2                                                                                         | 0.9970 | 0.9384 |
| Tgfb1    | Transforming growth factor, beta receptor 1                                                            | 0.9982 | 0.9684 |
| Adgrb1   | Brain-specific angiogenesis inhibitor 1                                                                | UD     |        |

|         |                                                                                |    |
|---------|--------------------------------------------------------------------------------|----|
| Cxcl1   | Chemokine (C-X-C motif) ligand 1 (melanoma growth stimulating activity, alpha) | UD |
| Cxcl2   | Chemokine (C-X-C motif) ligand 2                                               | UD |
| F2      | Coagulation factor II (thrombin)                                               | UD |
| Fgf6    | Fibroblast growth factor 6                                                     | UD |
| Ifna1   | Interferon-alpha 1                                                             | UD |
| Ifnb1   | Interferon beta 1, fibroblast                                                  | UD |
| Ifng    | Interferon gamma                                                               | UD |
| Il6     | Interleukin 6                                                                  | UD |
| Lect1   | Leukocyte cell derived chemotaxin 1                                            | UD |
| Lep     | Leptin                                                                         | UD |
| Mmp3    | Matrix metalloproteinase 3                                                     | UD |
| Mmp9    | Matrix metalloproteinase 9                                                     | UD |
| Serpib5 | Serpin peptidase inhibitor, clade B (ovalbumin), member 5                      | UD |
| Tgfa    | Transforming growth factor alpha                                               | UD |

Note: UD- Undetectable, Cq>35.

Fold change in baseline angiogenic genes expression in the RV of Fischer and SD rats measured by quantitative RT-PCR. N=4 per group using beta-actin as housekeeping gene.

**Supplemental Table 6. Fold change in angiogenic gene expression in RV of both rat strains compared to vehicle.**

| Gene                                                | Gene name                                                                                              | Fischer     |         | SD          |         |
|-----------------------------------------------------|--------------------------------------------------------------------------------------------------------|-------------|---------|-------------|---------|
|                                                     |                                                                                                        | Fold change | p-value | Fold change | p-value |
| <b>Differently regulated genes in either strain</b> |                                                                                                        |             |         |             |         |
| Vegfc                                               | Vascular endothelial growth factor C                                                                   | 0.5038      | 0.0045  | 0.9919      | 0.9086  |
| Ptgs1                                               | Prostaglandin-endoperoxide synthase 1                                                                  | 1.8385      | 0.0056  | 0.9588      | 0.7228  |
| Fn1                                                 | Fibronectin 1                                                                                          | 1.8559      | 0.0071  | 1.5590      | 0.0718  |
| Edn1                                                | Endothelin 1                                                                                           | 2.2538      | 0.0199  | 1.2359      | 0.1722  |
| Mmp14                                               | Matrix metalloproteinase 14 (membrane-inserted)                                                        | 0.6985      | 0.0274  | 0.8150      | 0.0823  |
| Tgfb1                                               | Transforming growth factor, beta receptor 1                                                            | 0.7141      | 0.0298  | 0.8800      | 0.1027  |
| Tnf                                                 | Tumor necrosis factor (TNF superfamily, member 2)                                                      | 0.4590      | 0.0427  | 0.9092      | 0.3677  |
| Vegfa                                               | Vascular endothelial growth factor A                                                                   | 0.5956      | 0.0510  | 0.6065      | 0.0040  |
| Pecam1                                              | Platelet/endothelial cell adhesion molecule 1                                                          | 0.6923      | 0.0546  | 0.6640      | 0.0020  |
| Ang1                                                | Angiogenin, ribonuclease, RNase A family, 5                                                            | 0.5470      | 0.0705  | 0.4783      | 0.0294  |
| Tymp                                                | Thymidine phosphorylase                                                                                | 0.7453      | 0.0944  | 0.7541      | 0.0153  |
| Fgf1                                                | Fibroblast growth factor 1                                                                             | 0.6604      | 0.0965  | 0.6406      | 0.0050  |
| Nos3                                                | Nitric oxide synthase 3, endothelial cell                                                              | 0.7472      | 0.1027  | 0.6469      | 0.0059  |
| Pdgfb                                               | Platelet-derived growth factor beta polypeptide (simian sarcoma viral (v-sis) oncogene homolog)        | 0.7532      | 0.1230  | 0.6071      | 0.0001  |
| Figf                                                | C-fos induced growth factor                                                                            | 1.4159      | 0.1646  | 1.7456      | 0.0285  |
| Serp11                                              | Serpin peptidase inhibitor, clade E (nexin, plasminogen activator inhibitor type1), member 1           | 1.6212      | 0.1668  | 2.2051      | 0.0019  |
| Angpt2                                              | Angiopoietin 2                                                                                         | 1.0225      | 0.9287  | 0.7238      | 0.0040  |
| <b>Up-regulated genes in both the strains</b>       |                                                                                                        |             |         |             |         |
| Thbs1                                               | Thrombospondin 1                                                                                       | 4.5011      | 0.0006  | 3.2311      | 0.0103  |
| Timp1                                               | metalloproteinase inhibitor 1                                                                          | 2.9759      | 0.0016  | 2.9892      | 0.0000  |
| Tgfb2                                               | Transforming growth factor, beta receptor 2                                                            | 6.1616      | 0.0089  | 4.2252      | 0.0003  |
| Ctgf                                                | Connective tissue growth factor                                                                        | 7.6548      | 0.0155  | 6.1891      | 0.0003  |
| Ccl2                                                | Chemokine (C-C motif) ligand 2                                                                         | 1.6799      | 0.0164  | 2.7391      | 0.0011  |
| Serp11                                              | Serpin peptidase inhibitor, clade F (alpha-2 antiplasmin, pigment epithelium derived factor), member 1 | 1.9996      | 0.0166  | 1.8559      | 0.0002  |
| Sphk1                                               | Sphingosine kinase 1                                                                                   | 4.0936      | 0.0260  | 2.8188      | 0.0003  |
| Tgfb1                                               | Transforming growth factor, beta receptor 1                                                            | 1.4564      | 0.0352  | 1.3692      | 0.0094  |
| Eng                                                 | Endoglin                                                                                               | 1.3109      | 0.1426  | 1.1139      | 0.1590  |
| Itgb3                                               | Integrin, beta 3                                                                                       | 1.2237      | 0.2329  | 0.8932      | 0.3257  |

|         |                                             |        |        |        |        |
|---------|---------------------------------------------|--------|--------|--------|--------|
| Col18a1 | Collagen, type XVIII, alpha 1               | 1.2452 | 0.3091 | 1.2161 | 0.3751 |
| Tgfb3   | Transforming growth factor, beta receptor 3 | 1.2035 | 0.6953 | 0.7700 | 0.0815 |
| S1pr1   | Sphingosine-1-phosphate receptor 1          | 1.0559 | 0.8415 | 0.9048 | 0.2170 |

**Down-regulated genes in both the strains**

|        |                                                                                                                |        |        |        |        |
|--------|----------------------------------------------------------------------------------------------------------------|--------|--------|--------|--------|
| Angpt1 | Angiotensinogen 1                                                                                              | 0.0675 | 0.0004 | 0.1493 | 0.0025 |
| Epas1  | Endothelial PAS domain protein 1                                                                               | 0.3536 | 0.0008 | 0.4584 | 0.0003 |
| Mapk14 | Mitogen activated protein kinase 14                                                                            | 0.4547 | 0.0028 | 0.5769 | 0.0070 |
| Pdgfa  | Platelet-derived growth factor alpha polypeptide                                                               | 0.4841 | 0.0028 | 0.5653 | 0.0001 |
| F3     | Coagulation factor III (thromboplastin, tissue factor)                                                         | 0.3796 | 0.0067 | 0.4835 | 0.0025 |
| ErbB2  | V-erb-b2 erythroblastic leukemia viral oncogene homolog 2, neuro/glioblastoma derived oncogene homolog (avian) | 0.4532 | 0.0068 | 0.6054 | 0.0077 |
| Vegfb  | Vascular endothelial growth factor B                                                                           | 0.4437 | 0.0071 | 0.5246 | 0.0009 |
| Efna1  | Ephrin A1                                                                                                      | 0.4483 | 0.0074 | 0.5457 | 0.0001 |
| Egf    | Epidermal growth factor                                                                                        | 0.3910 | 0.0087 | 0.6171 | 0.0410 |
| Anpep  | Alanine aminopeptidase                                                                                         | 0.6472 | 0.0133 | 0.7150 | 0.0111 |
| Akt1   | V-akt murine thymoma viral oncogene homolog 1                                                                  | 0.4791 | 0.0133 | 0.6037 | 0.0004 |
| Ptk2   | protein tyrosine kinase 2                                                                                      | 0.6770 | 0.0137 | 0.6929 | 0.0108 |
| Timp3  | metalloproteinase inhibitor 3                                                                                  | 0.7475 | 0.0164 | 0.6485 | 0.0011 |
| Tek    | tyrosine kinase, endothelial                                                                                   | 0.5565 | 0.0175 | 0.5643 | 0.0020 |
| Flt1   | Fms-related tyrosine kinase 1                                                                                  | 0.5934 | 0.0186 | 0.6933 | 0.0039 |
| Cdh5   | Cadherin 5                                                                                                     | 0.5988 | 0.0186 | 0.6593 | 0.0056 |
| Jag1   | Jagged 1                                                                                                       | 0.5006 | 0.0284 | 0.6925 | 0.0056 |
| Hif1a  | Hypoxia-inducible factor 1, alpha subunit (basic helix-loop-helix transcription factor)                        | 0.5127 | 0.0288 | 0.6997 | 0.0148 |
| Col4a3 | Collagen, type IV, alpha 3                                                                                     | 0.6726 | 0.0332 | 0.6696 | 0.0249 |
| Pgf    | Placental growth factor                                                                                        | 0.5984 | 0.0459 | 0.5437 | 0.0054 |
| Timp2  | metalloproteinase inhibitor 2                                                                                  | 0.8105 | 0.0503 | 1.0329 | 0.7315 |
| Cxcl9  | Chemokine (C-X-C motif) ligand 9                                                                               | 0.6016 | 0.0544 | 0.5832 | 0.0601 |
| Igfl1  | Insulin-like growth factor 1                                                                                   | 0.7577 | 0.0665 | 0.7807 | 0.1014 |
| Itgav  | Integrin, alpha V                                                                                              | 0.7660 | 0.0793 | 1.0125 | 0.8125 |
| Hgf    | Hepatocyte growth factor                                                                                       | 0.7324 | 0.0834 | 0.8754 | 0.2322 |
| Fgfr3  | Fibroblast growth factor receptor 3                                                                            | 0.7204 | 0.0902 | 0.7682 | 0.1406 |
| Id1    | Inhibitor of DNA binding 1                                                                                     | 0.7664 | 0.1110 | 0.9136 | 0.3198 |
| Fgf2   | Fibroblast growth factor 2                                                                                     | 0.7227 | 0.1486 | 0.9463 | 0.5781 |
| Tie1   | Tyrosine kinase with immunoglobulin-like and EGF-like domains 1                                                | 0.7721 | 0.1668 | 0.8051 | 0.1008 |

|         |                                                                                |        |        |        |        |
|---------|--------------------------------------------------------------------------------|--------|--------|--------|--------|
| Nrp1    | Neuropilin 1                                                                   | 0.8036 | 0.2355 | 0.8088 | 0.0651 |
| Itga1   | Integrin, alpha 5 (fibronectin receptor, alpha polypeptide)                    | 0.8088 | 0.2444 | 1.1269 | 0.2325 |
| Mmp2    | Matrix metalloproteinase 2                                                     | 0.8606 | 0.2745 | 0.9404 | 0.5291 |
| Plg     | Plasminogen                                                                    | 0.8329 | 0.3869 | 0.9165 | 0.5298 |
| Kdr     | Kinase insert domain receptor                                                  | 0.8347 | 0.4109 | 0.8211 | 0.0842 |
| Il1b    | Interleukin 1 beta                                                             | 0.8706 | 0.4468 | 1.5450 | 0.4679 |
| Nrp2    | Neuropilin 2                                                                   | 0.9238 | 0.5872 | 0.8856 | 0.2934 |
| Mdk     | Midkine                                                                        | 0.9712 | 0.7165 | 1.2978 | 0.1503 |
| Mmp19   | Matrix metalloproteinase 19                                                    | 0.9778 | 0.7918 | 0.9715 | 0.7299 |
| Plau    | Plasminogen activator, urokinase                                               | 0.9835 | 0.8094 | 1.0521 | 0.8072 |
| Adgrb1  | Brain-specific angiogenesis inhibitor 1                                        | UD     |        | UD     |        |
| Cxcl1   | Chemokine (C-X-C motif) ligand 1 (melanoma growth stimulating activity, alpha) | UD     |        | 0.7147 | 0.3784 |
| Cxcl2   | Chemokine (C-X-C motif) ligand 2                                               | UD     |        | UD     |        |
| F2      | Coagulation factor II (thrombin)                                               | UD     |        | UD     |        |
| Fgf6    | Fibroblast growth factor 6                                                     | UD     |        | UD     |        |
| Ifna1   | Interferon-alpha 1                                                             | UD     |        | UD     |        |
| Ifnb1   | Interferon beta 1, fibroblast                                                  | UD     |        | UD     |        |
| Il6     | Interleukin 6                                                                  | UD     |        | UD     |        |
| Lect1   | Leukocyte cell derived chemotaxin 1                                            | UD     |        | UD     |        |
| Lep     | Leptin                                                                         | UD     |        | UD     |        |
| Mmp3    | Matrix metalloproteinase 3                                                     | UD     |        | UD     |        |
| Mmp9    | Matrix metalloproteinase 9                                                     | UD     |        | UD     |        |
| Serpib5 | Serpin peptidase inhibitor, clade B (ovalbumin), member 5                      | UD     |        | UD     |        |
| Tgfa    | Transforming growth factor alpha                                               | UD     |        | 3.3091 | 0.0998 |
| Ifng    | Interferon gamma                                                               | 0.4063 | 0.0216 | UD     |        |

Note: UD- Undetectable, Cq>35.

Fold change in angiogenic genes expression in the RV of SUHx Fischer and SD rats relative to vehicle control of respective group. Gene expression was measured by quantitative RT-PCR, N=4 per group using beta-actin as housekeeping gene.



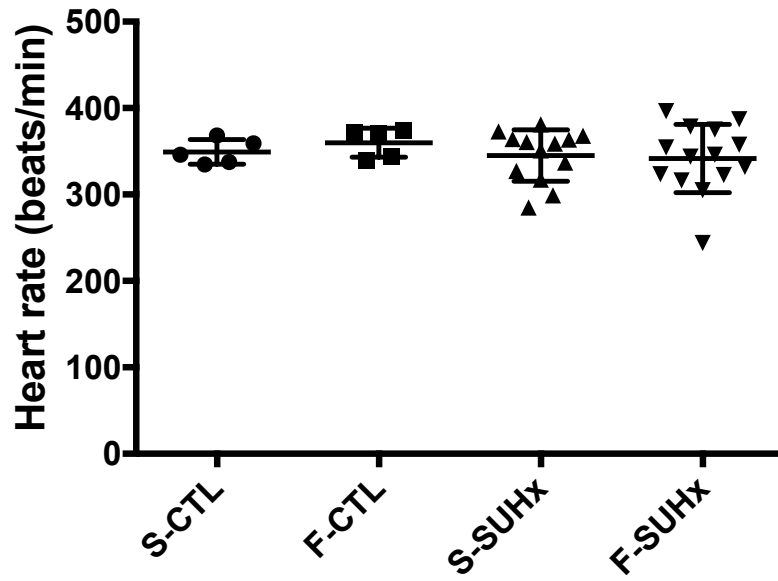

**Supplemental Figure 1: Heart rate variability.** Bar graph demonstrating heart rate of Fischer control, SD control, SD SUHx and Fischer SUHx rats, as determined by echocardiography.

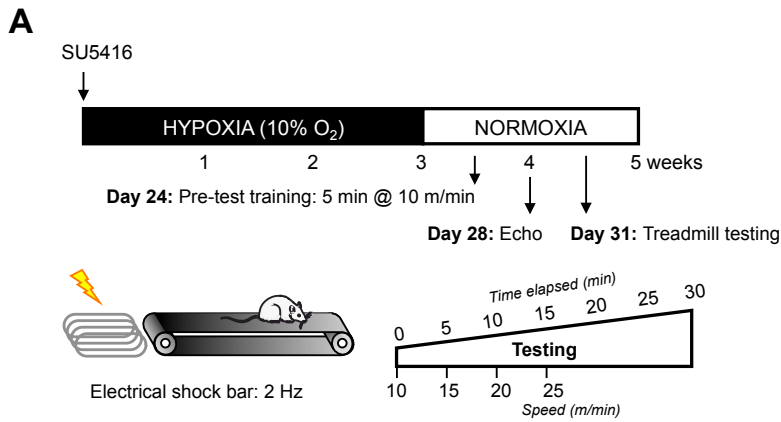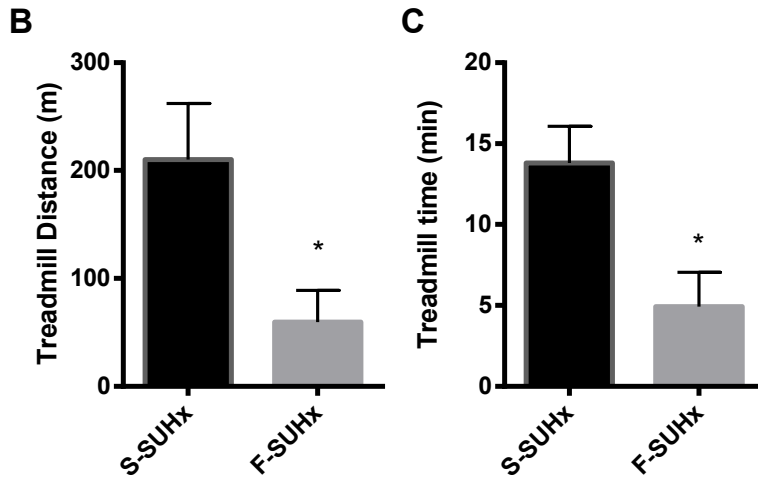

**Supplemental Figure 2: Exercise tolerance testing at 4 weeks post SU.** (A) Timeline of treadmill exercise testing and echocardiography. Training is performed 7 days prior to treadmill testing (top). Schematic of treadmill configuration with electric stimulus at the rear of the treadmill belt (bottom left). Treadmill testing protocol (bottom right) begins at a speed of 5 m/min, after which the speed is increased by 5 m/min every 5 min until a maximum speed of 25 m/min is reached. Exercise capacity in Fischer vs SD SUHx rats as determined by treadmill (B) distance and (C) time. \* $p < 0.05$  by Student's t-test.  $n = 4$  in each group

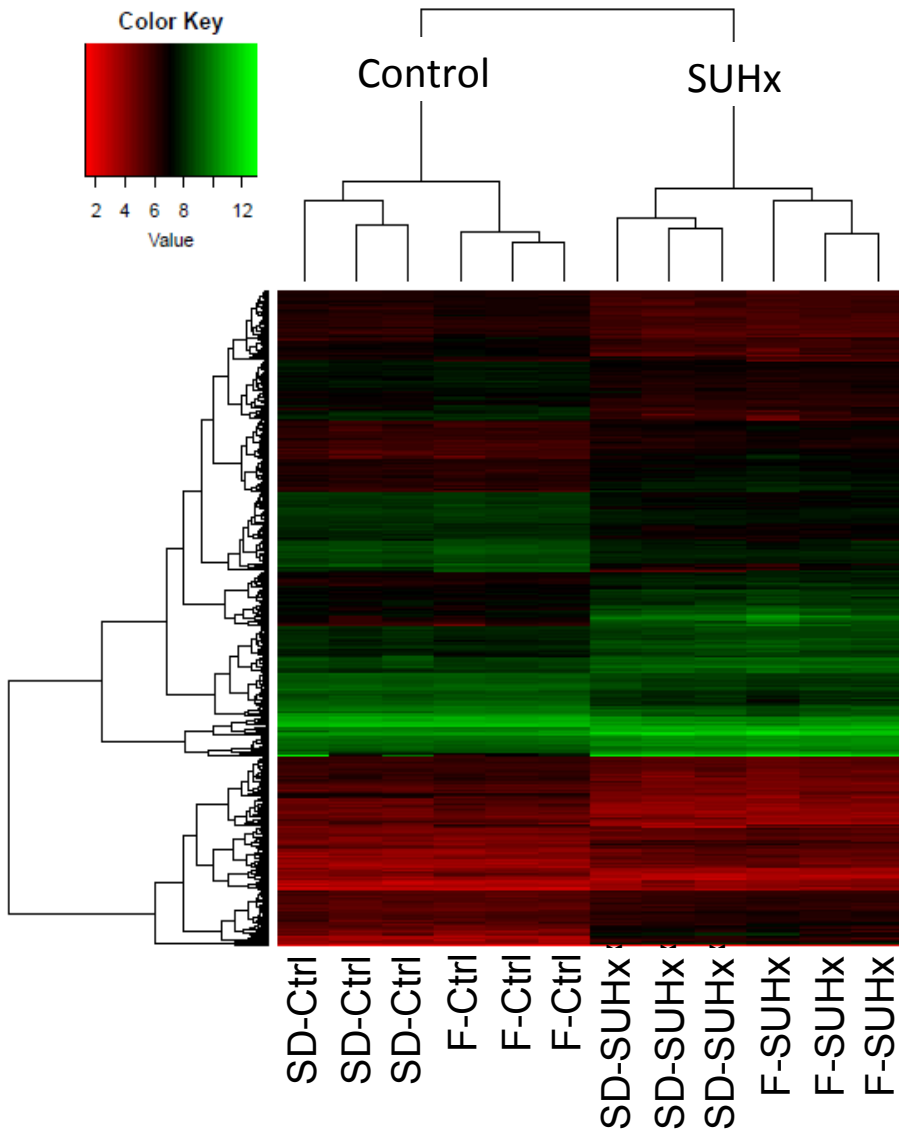

**Supplemental Figure 3:** Heatmap demonstrating differentially expressed genes in RV of SUHx Sprague-Dawley or Fischer CDF rats compared to respective controls.

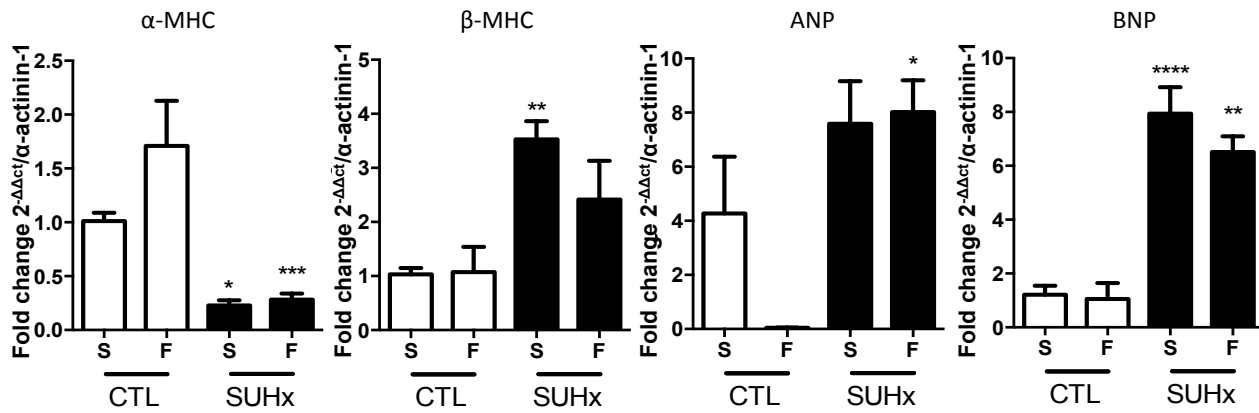

**Supplemental Figure 4.** Right ventricular expression of genes involved in cardiac remodeling in Fischer and SD rats with or without SUHx measured by quantitative RT-PCR. \*, \*\*, \*\*\*, \*\*\*\* p < 0.05, 0.01, 0.001, 0.0001 vs control. n = 3-6 per group using alpha-actinin-1 as housekeeping gene

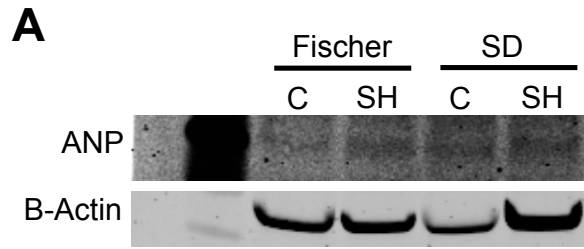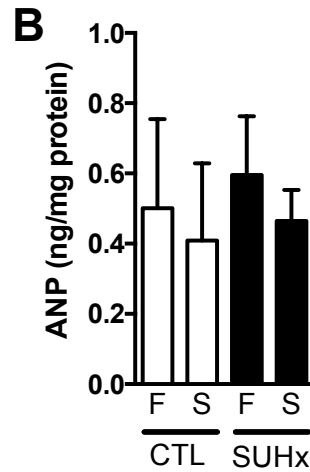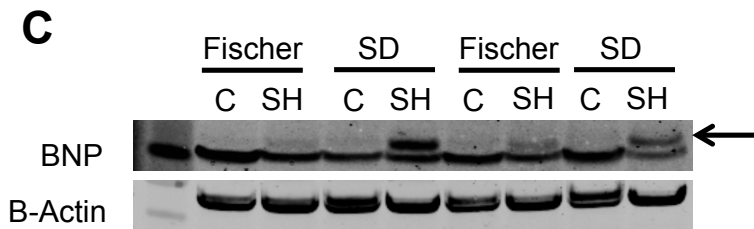

**Supplemental Figure 5: Natriuretic peptide expression in RV.** A. Representative image of a western-blot demonstrating ANP protein expression in RV of SD and Fischer +/- SUHx; n=3-4 per group. B. ANP levels in the RV (n=3-5 per group) of SD and Fischer +/- SUHx. C. Representative image of a western-blot showing BNP protein expression in RV of SD and Fischer +/- SUHx; n=3-4 per group.

## **Methods**

### **Ethics**

All study protocols were approved by the animal ethics and research committee (University of Ottawa, Ontario, Canada) and conducted according to guidelines from the Canadian Council for the Care of on Animal Care (CCAC).

### **SU5416+chronic hypoxia model of PAH**

Male Sprague Dawley (SD, Harlan laboratories, Indianapolis, IND, USA) and Fischer (CDF, Charles River, Montreal, QC, Canada) rats weighing 125-200 g were used for this study. PH was induced by a single subcutaneous injection of SU5416 (SU:3-(3,5-dimethyl-1H-pyrrol-2-ylmethylene)-1,3-dihydroindol-2-one) (Tocris, Bristol, United Kingdom) suspended in 0.5% vehicle of CMC (0.5% carboxymethylcellulose sodium, 0.9% sodium chloride, 0.4% Tween 80, 0.9% benzyl alcohol in deionized water) as previously described<sup>1,2</sup>. Immediately after SU injection, rats were exposed to chronic hypoxia (8.5-10% O<sub>2</sub>) in hypoxic chamber system using controlled nitrogen gas release (Biospherix, Lacona, NY, USA) for 3 weeks (SU5416-hypoxia; SUHx). Control rats received CMC vehicle and remained at room air (21% O<sub>2</sub>) until end study at 4 or 7 weeks.

### **Non-invasive assessment by echocardiography**

Echocardiography was performed using the Vevo2100 ultrasonography system (VisualSonics, Toronto, ON, Canada). Rats were anesthetized using 2-3% inhaled isoflurane. Using short-axis M-mode echocardiography, RV chamber size was expressed as the ratio of end-diastolic RV to LV internal diameter (RVID-d/LVID-d) obtained. RV free wall (RVFW) thickness was measured as the distance between the epicardium and the endocardium of the right ventricular wall. Pulsed-wave Doppler mode was used to assess pulmonary artery flow in the parasternal long axis view. Cardiac

output (CO) was calculated using the pulmonary artery velocity time integral PA-VTI method as previously described<sup>3</sup>, where pulmonary artery cross section area ( $PA_{CSA}$ ) =  $\pi (PA_{diameter}/2)^2$ , stroke volume (SV) =  $PA_{CSA} \times PA-VTI$ , and  $CO = SV \times \text{heart rate}$ .

### **Cardiac magnetic resonance imaging (MRI)**

Cardiac magnetic resonance imaging was performed using the 7T GE/Agilent MRI system at the uOttawa preclinical imaging core. Rats were anaesthetized using 2% inhaled isoflurane. Axial, two-chamber, and short-axis localizer scans were first performed, followed by short-axis cine. For the short-axis cine, ECG gating was used with 30 reconstructed cardiac phases and 2 views per segment. The field of view, matrix size, and slice thickness were 7 cm, 256x192, and 1.5 mm, respectively. Using short-axis cine MRI, RV and LV volumes were calculated by summation of the endocardial volume of sequential stacks during diastole or systole using ImageJ. RV ejection fraction was calculated as  $(\text{end diastolic volume} - \text{end systolic volume})/\text{end diastolic volume} \times 100\%$ .

### **Right heart catheterization**

Rats were anesthetized by an intraperitoneal injection of xylazine (7 mg/kg) and ketamine (35 mg/kg). High-fidelity pressure catheters (Transonic-Scisense Inc., London, ON, Canada) were inserted into the right jugular vein and advanced through the superior vena cava and right atrium into the RV. Hemodynamic parameters were recorded and analyzed using the LabScribe3 software (iWorx, Dover, NH, USA).

### **Lung and heart Morphometric and Histological Measurements**

Following right heart catheterization, rats were euthanized under anaesthesia by exsanguination and thorax was opened. The left lobe of the lung was inflated via the trachea with 50:50 OCT/saline solution (Tissue-Tek OCT; Qiagen, Mississauga, ON, Canada) and then removed. The left lobe and

whole heart was then sectioned and fixed in 4% paraformaldehyde (PFA) for 48 h, rinsed and washed in PBS for overnight and stored in 70% ethanol until the day of paraffin embedding. Tissue blocks were sectioned 5  $\mu\text{m}$  thickness with a microtome (Leica Microsystems, Concord, ON, Canada), placed onto poly-L-lysine-coated slides, dried at 37°C for 16 hours and then dewaxed and dehydrated through graded alcohols. For microscopy and quantitative morphometry of the lung, hematoxylin and eosin (H&E) staining was performed with standard protocols and data was analyzed using the Aperio Imagescope Plus software (Leica, Concord, ON, Canada). We counted small pulmonary arteries (outer diameter (OD)  $<200 \mu\text{m}$ ) from two cross sections of left lobe per rat. Vessels were assessed for occlusive lesions using H and E staining and scored as follows: no evidence of neointimal formation (Grade 0); partial luminal occlusion ( $<50\%$ , Grade 1); and severe luminal occlusion ( $>50\%$ ; Grade 2). Morphology of the heart and cardiomyocytes was assessed using Masson's Trichrome staining using standard protocols. For quantitative assessment of RV cardiomyocyte cross sectional area, the area of each cardiomyocyte was traced from each 3 random cross-sectional fields /animal (20X objective).

### **Immunohistochemistry**

Paraffin heart sections were deparaffinized through graded alcohols. After antigen unmasking specimens were blocked in 2% normal goat serum in PBS-T. Endogenous biotin and avidin were blocked using the Vector Avidin/Biotin blocking kit (Vector Labs, Burlington, ON, Canada). Sections were stained with rabbit polyconal antibody to CD31 (Novus Biologicals, Oakville, ON, Canada) at 1:250 dilution for 1 hour at room temperature, followed by endogenous peroxidase quenching by incubation with 3%  $\text{H}_2\text{O}_2$  for 15 minutes. Sections were then incubated with biotinylated goat anti-rabbit IgG antibody at 1:66 dilution (Vector Labs, Burlington, ON, Canada), followed by DAB staining using the VECTASTAIN ABC Elite kit (Vector Labs, Burlington, ON, Canada) according to manufacturer's protocol.



For natural cytotoxicity receptor-1 (NCR1), paraffin heart sections were stained with rabbit polyconal antibody to NCR1 (Abcam, ON, Canada) at 1:400 dilution followed by DAB staining using Rabbit specific HRP/DAB (ABC) Detection IHC Kit (Abcam, ON, Canada) according to manufacturer's protocol. Images were acquired using Nikon Eclipse TE2000 inverted microscopes using 10X and 40X objectives (Nikon C1si, Nikon Instruments Inc., NY, USA) and NCR1 positive cells were counted using the open-source softwares ImageJ (Fiji package). Total NCR1 positive cells per high magnification (40X) image were calculated and 5 images per sample were analyzed.

### **Fluorescence microangiography**

Following exsanguination, residual blood was flushed using 60 mL of heparinized saline (10 U/mL) via jugular vein. The ascending aorta and pulmonary vein were ligated and an incision was made in the right atrium. A cannula was inserted into the aorta to deliver warm (37°C) flush buffer (10 U/mL heparin, 0.0025 ng/mL sodium nitroprusside) to flush the coronary circulation by retrograde perfusion. Approximately 2 mL of pre-warmed 0.22  $\mu\text{m}$  fluorescent microspheres dissolved in 2% low melting point agarose (Life Technologies, Burlington, ON, Canada) were perfused into the coronary circulation via the aorta. Immediately afterwards, the heart was placed on ice for 5 minutes to cast the fluorescent microspheres, and then fixed in 4% PFA for 48 h. Following a PBS wash, whole hearts were embedded in frozen OCT ((Tissue-Tek OCT; Qiagen, Mississauga, ON, Canada) and sectioned into 50  $\mu\text{m}$  sections using a cryostat (Leica Microsystems, Concord, ON, Canada). Slides were washed in PBS, mounted with Vector Hardset mounting medium (Vector Labs, Burlington, ON, Canada) and coverslipped. The FMA sections were visualized using a laser confocal microscope (Zeiss LSM510), where 40 z-stacks at 20X objective per slide were acquired using a 1  $\mu\text{m}$  step size. To quantify capillary volume, fluorescent pixels were thresholded based on a uniform pixel intensity to represent filled vessels using ImageJ (threshold=50). For each stack, the thresholded pixel area (capillary area, in  $\mu\text{m}^2$ ) was multiplied by the stack depth (1  $\mu\text{m}$ ), where

capillary Volume = capillary area x stack depth. The total capillary volume was represented by the summation of 40 stacks.

### **Microarray gene expression and analysis**

RNA was isolated as described above and total RNA was assayed using Affymetrix Rat Gene 2.0ST and Affymetrix miRNA 4.0 gene chips. Annotations from Affymetrix (RaGene-2\_0-st-v1.na35.rn5.transcript) were used to assign gene symbols. Fold change analyses were performed using the R Bioconductor limma package, according to gene expression changes in PH vs control in SD and F subsets with cutoff values of adjusted p-value < 0.05 and fold-change > 3. Heat maps and hierarchical clustering were also constructed in R Bioconductor. Fold change analyses used the limma package and PCA analysis used prcomp. For gene-gene ontology enrichment analysis, lists were subdivided into fold-changes common to both, unique to SD and unique to Fischer, and gene ontology was performed on each subset using the DAVID Functional Annotation tool (<https://david.ncifcrf.gov/>) using the PANTHER database for biological processes.

### **PCR array for angiogenic genes**

RV tissue was snap frozen in liquid nitrogen and stored at -80° C until RNA isolation. Tissue homogenization was achieved using the TissueLyser-II system (Qiagen, Toronto, ON, Canada) at 30 Hz for 5 min followed by RNA isolation lysis using miRCURY RNA isolation kit (Exiqon, Woburn, MA, USA) according to manufacturer's protocol.

cDNA was prepared using RT<sup>2</sup> First Strand Kit (Qiagen, Toronto, ON, Canada) as per manufacturer's instructions. The cDNA was stored at -80° C until used for the RT<sup>2</sup> Profiler PCR array for angiogenic genes (Qiagen, Toronto, ON, Canada). Quantitative RT-PCR was performed using SYBR green qPCR mastermix (Qiagen, Toronto, ON, Canada) as per the manufacturer's instructions.

### **Quantitative real-time PCR**

RNA was isolated as described above and converted to cDNA using the Taqman High Capacity cDNA Reverse Transcription kit (Applied Biosystems, Burlington, ON, Canada). Quantitative RT-PCR was performed using Taqman probes for rat  $\alpha$ -myosin heavy chain (Myh6, Rn00691721\_g1),  $\beta$ -myosin heavy chain (Myh7, Rn01488777\_g1), atrial natriuretic peptide (Nppa, Rn00664637\_g1), brain natriuretic peptide (Nppb, Rn04219558\_g1) and  $\alpha$ -actinin-1 (Actn1, Rn00667357\_m1) (Applied Biosystems, Burlington, ON, Canada).

### **Atrial natriuretic peptide ELISA**

Atrial natriuretic peptide in the RV homogenate and plasma was measured using ANP (NPPA) rat ELISA kit (Abcam, ON, Canada) as per manufacturer's instructions. Briefly, the RV was weighed and homogenized using 0.1% Triton-X 100 in PBS (pH 7.4) using the TissueLyser (Qiagen, ON, Canada) two cycles of 25hz for 3 min. The homogenate was centrifuged at 12000xg for 20 min at 4° C and the supernatant was collected. Protein concentration of the supernatant was measured by the DC Protein Assay (Bio-rad, ON, Canada) and 150  $\mu$ g protein was used per test. For plasma, 50  $\mu$ L of undiluted plasma was used per test. Samples were analyzed in triplicates.

### **Western blotting**

RV lysates were prepared in CellLytic™ MT Cell Lysis Reagent (Sigma, ON, Canada) using the TissueLyser (Qiagen, ON, Canada) two cycles of 25hz for 3 min. The tissue lysate was then centrifuged at 12000xg for 10 min and supernatant was collected. Protein concentration of the protein extract was determined colorimetrically by the DC Protein Assay kit (Bio-rad, ON, Canada), using bovine serum albumin as standard. SDS-polyacrylamide gel electrophoresis of RV protein extract (50  $\mu$ g) was performed with NuPAGE® Novex® 4-12% Bis-Tris Protein Gels (ThermoFisher Scientific, ON, Canada). Following transfer of the separated proteins to nitrocellulose membranes

(NOVEX iBLOT Gel transfer Stacks, ThermoFisher Scientific, ON, Canada), blots were blocked with 2% BSA in PBS-T (PBS containing 0.1% Tween 20, pH 7.4). After blocking, blots were incubated with primary antibodies to Atrial natriuretic peptide (Abcam, ON, Canada), B-type natriuretic peptide (EMD Millipore, ON, Canada) and  $\beta$ -actin (ThermoFisher Scientific, ON, Canada) for overnight at 4° C. Then the blots were washed for three times for 15 min with PBS-T and incubated with appropriate IRDye<sup>®</sup> anti-rabbit or anti-mouse secondary antibodies (LI-COR Biotechnology, NE, USA) in 2% BSA/PBS-T. Further the blots were washed for three times for 15 min with PBS-T and imaged with Odyssey<sup>®</sup> imaging system (LI-COR Biotechnology, NE, USA).

## References:

1. Taraseviciene-Stewart L, Kasahara Y, Alger L, Hirth P, Mc Mahon G, Waltenberger J, Voelkel NF and Tuder RM. Inhibition of the VEGF receptor 2 combined with chronic hypoxia causes cell death-dependent pulmonary endothelial cell proliferation and severe pulmonary hypertension. *FASEB J.* 2001;15:427-38.
2. Jiang B, Deng Y, Suen C, Taha M, Chaudhary KR, Courtman DW and Stewart DJ. Marked Strain-Specific Differences in the SU5416 Rat Model of Severe Pulmonary Arterial Hypertension. *American journal of respiratory cell and molecular biology.* 2016;54:461-8.
3. Urboniene D, Haber I, Fang YH, Thenappan T and Archer SL. Validation of high-resolution echocardiography and magnetic resonance imaging vs. high-fidelity catheterization in experimental pulmonary hypertension. *American journal of physiology Lung cellular and molecular physiology.* 2010;299:L401-12.
